# Supplementary material for: High-throughput sequencing of small RNA transcriptomes reveals critical biological features targeted by microRNAs in cell models used for squamous cell cancer research
Source: PubMed Central journal article supplement (PMC3870990; doi:10.1186/1471-2164-14-735), 2013-10-26
Supplement: 1471-2164-14-735-S1.pdf [file 1471-2164-14-735-S1.pdf]

## Additional File 1

| miRNAs expressed in keratinocytes |            | miRNAs expressed in SCC25 |            |
|-----------------------------------|------------|---------------------------|------------|
| miRNA                             | Read Count | miRNA                     | Read Count |
| hsa-mir-21                        | 27710      | hsa-mir-21                | 24303      |
| hsa-mir-205                       | 8003       | hsa-mir-205               | 11564      |
| hsa-mir-24-2                      | 6676       | hsa-mir-24-2              | 5567       |
| hsa-mir-23a                       | 4992       | hsa-mir-103a-2            | 3459       |
| hsa-mir-29b-2                     | 4170       | hsa-mir-23a               | 3449       |
| hsa-let-7a                        | 4085       | hsa-let-7a                | 1962       |
| hsa-mir-125b                      | 2803       | hsa-mir-29b-2             | 1218       |
| hsa-mir-29c                       | 2566       | hsa-mir-181a-1            | 1100       |
| hsa-mir-103a-2                    | 2141       | hsa-mir-17                | 1041       |
| hsa-mir-451a                      | 1941       | hsa-mir-30e               | 1016       |
| hsa-mir-27a                       | 1590       | hsa-mir-19b-1             | 1008       |
| hsa-mir-193b                      | 1390       | hsa-mir-26a-2             | 823        |
| hsa-mir-19b-1                     | 1319       | hsa-mir-451a              | 714        |
| hsa-let-7b                        | 1286       | hsa-mir-29c               | 543        |
| hsa-mir-26a-2                     | 1223       | hsa-mir-30c-1             | 510        |
| hsa-mir-3545                      | 1045       | hsa-mir-20a               | 461        |
| hsa-mir-199a                      | 1029       | hsa-mir-193b              | 433        |
| hsa-mir-1                         | 989        | hsa-mir-27a               | 421        |
| hsa-mir-130a                      | 933        | hsa-let-7b                | 410        |
| hsa-mir-30e                       | 872        | hsa-mir-125b              | 372        |
| hsa-mir-5572                      | 779        | hsa-mir-200a              | 370        |
| hsa-mir-17                        | 687        | hsa-mir-181b-1            | 344        |
| hsa-mir-1260a                     | 563        | hsa-mir-1                 | 327        |
| hsa-mir-22                        | 542        | hsa-mir-15a               | 310        |
| hsa-mir-92a-1                     | 480        | hsa-mir-125a              | 290        |
| hsa-mir-99a                       | 455        | hsa-mir-99a               | 252        |
| hsa-mir-4315                      | 448        | hsa-mir-92a-1             | 243        |
| hsa-mir-200a                      | 447        | hsa-mir-140               | 237        |
| hsa-mir-140                       | 390        | hsa-mir-1260a             | 226        |
| hsa-mir-135b                      | 324        | hsa-mir-301a              | 216        |
| hsa-mir-320b                      | 310        | hsa-mir-320b              | 213        |
| hsa-mir-214                       | 307        | hsa-mir-130a              | 201        |
| hsa-mir-125a                      | 303        | hsa-mir-19a               | 189        |
| hsa-mir-138-2                     | 303        | hsa-mir-200b              | 184        |
| hsa-mir-181a-1                    | 299        | hsa-mir-7                 | 172        |
| hsa-mir-376c                      | 290        | hsa-mir-16-1              | 167        |
| hsa-mir-141                       | 270        | hsa-mir-22                | 163        |
| hsa-let-7e                        | 260        | hsa-let-7e                | 161        |

|                |     |               |     |
|----------------|-----|---------------|-----|
| hsa-mir-30c-1  | 248 | hsa-mir-185   | 132 |
| hsa-mir-101-1  | 243 | hsa-mir-141   | 126 |
| hsa-mir-19a    | 231 | hsa-mir-210   | 123 |
| hsa-mir-370    | 223 | hsa-mir-199a  | 113 |
| hsa-mir-200b   | 221 | hsa-mir-4521  | 111 |
| hsa-mir-20a    | 211 | hsa-mir-181c  | 106 |
| hsa-mir-185    | 206 | hsa-mir-151b  | 105 |
| hsa-mir-331    | 199 | hsa-mir-484   | 100 |
| hsa-let-7i     | 193 | hsa-mir-101-1 | 87  |
| hsa-mir-15a    | 186 | hsa-mir-192   | 86  |
| hsa-mir-34a    | 185 | hsa-mir-370   | 85  |
| hsa-mir-484    | 166 | hsa-mir-4315  | 84  |
| hsa-mir-181b-1 | 164 | hsa-mir-5572  | 80  |
| hsa-mir-151b   | 153 | hsa-mir-100   | 79  |
| hsa-mir-133a   | 127 | hsa-mir-331   | 79  |
| hsa-mir-148b   | 114 | hsa-mir-18a   | 64  |
| hsa-mir-429    | 100 | hsa-mir-320c  | 62  |
| hsa-mir-16-1   | 93  | hsa-mir-138-2 | 60  |
| hsa-mir-192    | 92  | hsa-mir-135b  | 59  |
| hsa-mir-376a   | 90  | hsa-mir-34a   | 57  |
| hsa-mir-301a   | 87  | hsa-mir-107   | 56  |
| hsa-mir-186    | 86  | hsa-mir-10a   | 55  |
| hsa-mir-193a   | 82  | hsa-mir-155   | 53  |
| hsa-mir-3120   | 81  | hsa-mir-130b  | 52  |
| hsa-mir-152    | 79  | hsa-mir-148b  | 52  |
| hsa-mir-200c   | 75  | hsa-mir-429   | 46  |
| hsa-mir-378i   | 73  | hsa-mir-99b   | 43  |
| hsa-mir-150    | 71  | hsa-mir-133a  | 40  |
| hsa-let-7c     | 70  | hsa-mir-152   | 35  |
| hsa-mir-423    | 69  | hsa-let-7i    | 34  |
| hsa-mir-155    | 66  | hsa-mir-342   | 34  |
| hsa-mir-195    | 65  | hsa-mir-3545  | 34  |
| hsa-mir-130b   | 63  | hsa-mir-214   | 33  |
| hsa-mir-744    | 61  | hsa-mir-935   | 33  |
| hsa-mir-320c   | 58  | hsa-mir-186   | 32  |
| hsa-mir-708    | 56  | hsa-mir-324   | 31  |
| hsa-mir-495    | 54  | hsa-let-7c    | 30  |
| hsa-mir-342    | 50  | hsa-mir-181d  | 29  |
| hsa-mir-379    | 48  | hsa-mir-195   | 27  |
| hsa-mir-18a    | 46  | hsa-mir-744   | 26  |
| hsa-mir-107    | 45  | hsa-mir-150   | 25  |
| hsa-mir-4305   | 44  | hsa-mir-200c  | 25  |
| hsa-mir-100    | 43  | hsa-mir-4256  | 25  |

|                |    |                |    |
|----------------|----|----------------|----|
| hsa-mir-146b   | 42 | hsa-mir-423    | 23 |
| hsa-mir-7      | 36 | hsa-mir-132    | 22 |
| hsa-mir-197    | 35 | hsa-mir-146b   | 20 |
| hsa-mir-409    | 34 | hsa-mir-3529   | 20 |
| hsa-mir-4256   | 33 | hsa-mir-378i   | 20 |
| hsa-mir-99b    | 33 | hsa-mir-193a   | 19 |
| hsa-mir-1307   | 31 | hsa-mir-197    | 18 |
| hsa-mir-4500   | 31 | hsa-mir-1307   | 17 |
| hsa-mir-142    | 26 | hsa-mir-619    | 13 |
| hsa-mir-34c    | 26 | hsa-mir-940    | 13 |
| hsa-mir-34b    | 25 | hsa-mir-196a   | 12 |
| hsa-mir-324    | 24 | hsa-mir-3591   | 12 |
| hsa-mir-296    | 22 | hsa-mir-376c   | 12 |
| hsa-mir-135a-2 | 21 | hsa-mir-139    | 11 |
| hsa-mir-382    | 21 | hsa-mir-345    | 11 |
| hsa-mir-4302   | 21 | hsa-mir-3676   | 11 |
| hsa-mir-4521   | 21 | hsa-mir-135a-2 | 10 |
| hsa-mir-92b    | 20 | hsa-mir-142    | 10 |
| hsa-mir-154    | 19 | hsa-mir-615    | 10 |
| hsa-mir-127    | 18 | hsa-mir-625    | 10 |
| hsa-mir-3663   | 18 | hsa-mir-1180   | 9  |
| hsa-mir-337    | 17 | hsa-mir-3120   | 9  |
| hsa-mir-181c   | 16 | hsa-mir-34b    | 9  |
| hsa-mir-3676   | 16 | hsa-mir-4301   | 9  |
| hsa-mir-3184   | 15 | hsa-mir-497    | 8  |
| hsa-mir-494    | 15 | hsa-mir-4493   | 7  |
| hsa-mir-132    | 14 | hsa-mir-1301   | 6  |
| hsa-mir-215    | 14 | hsa-mir-194    | 6  |
| hsa-mir-328    | 14 | hsa-mir-3065   | 6  |
| hsa-mir-3529   | 14 | hsa-mir-330    | 6  |
| hsa-mir-3591   | 14 | hsa-mir-4700   | 6  |
| hsa-mir-493    | 14 | hsa-mir-628    | 6  |
| hsa-mir-326    | 13 | hsa-mir-92b    | 6  |
| hsa-mir-497    | 12 | hsa-mir-328    | 5  |
| hsa-mir-629    | 12 | hsa-mir-3615   | 5  |
| hsa-mir-10a    | 11 | hsa-mir-3940   | 5  |
| hsa-mir-136    | 11 | hsa-mir-4302   | 5  |
| hsa-mir-139    | 11 | hsa-mir-4724   | 5  |
| hsa-mir-194    | 11 | hsa-mir-548c   | 5  |
| hsa-mir-345    | 11 | hsa-mir-551a   | 5  |
| hsa-mir-369    | 11 | hsa-mir-1227   | 4  |
| hsa-mir-381    | 11 | hsa-mir-136    | 4  |
| hsa-mir-627    | 11 | hsa-mir-1972   | 4  |

|               |    |                |   |
|---------------|----|----------------|---|
| hsa-mir-664   | 10 | hsa-mir-215    | 4 |
| hsa-mir-1249  | 9  | hsa-mir-3184   | 4 |
| hsa-mir-1306  | 9  | hsa-mir-34c    | 4 |
| hsa-mir-454   | 9  | hsa-mir-3663   | 4 |
| hsa-mir-487a  | 9  | hsa-mir-376a   | 4 |
| hsa-mir-539   | 9  | hsa-mir-4305   | 4 |
| hsa-mir-543   | 9  | hsa-mir-4727   | 4 |
| hsa-mir-33a   | 8  | hsa-mir-4732   | 4 |
| hsa-mir-378f  | 8  | hsa-mir-629    | 4 |
| hsa-mir-433   | 8  | hsa-mir-641    | 4 |
| hsa-mir-619   | 8  | hsa-mir-664    | 4 |
| hsa-mir-642b  | 8  | hsa-mir-127    | 3 |
| hsa-mir-1180  | 7  | hsa-mir-1287   | 3 |
| hsa-mir-1260b | 7  | hsa-mir-129-2  | 3 |
| hsa-mir-196a  | 7  | hsa-mir-1910   | 3 |
| hsa-mir-210   | 7  | hsa-mir-2110   | 3 |
| hsa-mir-330   | 7  | hsa-mir-329    | 3 |
| hsa-mir-3653  | 7  | hsa-mir-338    | 3 |
| hsa-mir-625   | 7  | hsa-mir-4419b  | 3 |
| hsa-mir-769   | 7  | hsa-mir-4530   | 3 |
| hsa-mir-1301  | 6  | hsa-mir-454    | 3 |
| hsa-mir-134   | 6  | hsa-mir-4999   | 3 |
| hsa-mir-144   | 6  | hsa-mir-511    | 3 |
| hsa-mir-181d  | 6  | hsa-mir-515-2  | 3 |
| hsa-mir-4301  | 6  | hsa-mir-558    | 3 |
| hsa-mir-762   | 6  | hsa-mir-708    | 3 |
| hsa-mir-940   | 6  | hsa-mir-765    | 3 |
| hsa-mir-187   | 5  | hsa-mir-1249   | 2 |
| hsa-mir-1910  | 5  | hsa-mir-1254   | 2 |
| hsa-mir-299   | 5  | hsa-mir-1260b  | 2 |
| hsa-mir-3065  | 5  | hsa-mir-1278   | 2 |
| hsa-mir-431   | 5  | hsa-mir-1289-1 | 2 |
| hsa-mir-4484  | 5  | hsa-mir-1297   | 2 |
| hsa-mir-4485  | 5  | hsa-mir-1302-1 | 2 |
| hsa-mir-487b  | 5  | hsa-mir-1909   | 2 |
| hsa-mir-548ar | 5  | hsa-mir-212    | 2 |
| hsa-mir-659   | 5  | hsa-mir-301b   | 2 |
| hsa-mir-1185  | 4  | hsa-mir-3157   | 2 |
| hsa-mir-1247  | 4  | hsa-mir-3158-2 | 2 |
| hsa-mir-1290  | 4  | hsa-mir-3160-2 | 2 |
| hsa-mir-211   | 4  | hsa-mir-3191   | 2 |
| hsa-mir-3118  | 4  | hsa-mir-3198   | 2 |
| hsa-mir-329   | 4  | hsa-mir-320e   | 2 |

|                |   |                 |   |
|----------------|---|-----------------|---|
| hsa-mir-338    | 4 | hsa-mir-33a     | 2 |
| hsa-mir-33b    | 4 | hsa-mir-3618    | 2 |
| hsa-mir-411    | 4 | hsa-mir-3664    | 2 |
| hsa-mir-4323   | 4 | hsa-mir-3681    | 2 |
| hsa-mir-548d-2 | 4 | hsa-mir-3713    | 2 |
| hsa-mir-935    | 4 | hsa-mir-379     | 2 |
| hsa-mir-1268a  | 3 | hsa-mir-3913    | 2 |
| hsa-mir-1297   | 3 | hsa-mir-4293    | 2 |
| hsa-mir-212    | 3 | hsa-mir-4480    | 2 |
| hsa-mir-3646   | 3 | hsa-mir-4492    | 2 |
| hsa-mir-3664   | 3 | hsa-mir-4528    | 2 |
| hsa-mir-3713   | 3 | hsa-mir-4671    | 2 |
| hsa-mir-372    | 3 | hsa-mir-483     | 2 |
| hsa-mir-422a   | 3 | hsa-mir-487b    | 2 |
| hsa-mir-515-2  | 3 | hsa-mir-494     | 2 |
| hsa-mir-548av  | 3 | hsa-mir-495     | 2 |
| hsa-mir-5694   | 3 | hsa-mir-543     | 2 |
| hsa-mir-616    | 3 | hsa-mir-544a    | 2 |
| hsa-mir-641    | 3 | hsa-mir-622     | 2 |
| hsa-mir-654    | 3 | hsa-mir-762     | 2 |
| hsa-mir-655    | 3 | hsa-mir-769     | 2 |
| hsa-mir-1227   | 2 | hsa-mir-122     | 1 |
| hsa-mir-1237   | 2 | hsa-mir-1225    | 1 |
| hsa-mir-1273g  | 2 | hsa-mir-1233    | 1 |
| hsa-mir-129-2  | 2 | hsa-mir-1255b-2 | 1 |
| hsa-mir-1304   | 2 | hsa-mir-1268b   | 1 |
| hsa-mir-190a   | 2 | hsa-mir-1273f   | 1 |
| hsa-mir-1972   | 2 | hsa-mir-1273g   | 1 |
| hsa-mir-2116   | 2 | hsa-mir-1281    | 1 |
| hsa-mir-3125   | 2 | hsa-mir-1291    | 1 |
| hsa-mir-3177   | 2 | hsa-mir-1296    | 1 |
| hsa-mir-3180   | 2 | hsa-mir-1306    | 1 |
| hsa-mir-3191   | 2 | hsa-mir-144     | 1 |
| hsa-mir-323a   | 2 | hsa-mir-147b    | 1 |
| hsa-mir-3613   | 2 | hsa-mir-1538    | 1 |
| hsa-mir-365a   | 2 | hsa-mir-2116    | 1 |
| hsa-mir-3670   | 2 | hsa-mir-217     | 1 |
| hsa-mir-3682   | 2 | hsa-mir-2392    | 1 |
| hsa-mir-377    | 2 | hsa-mir-296     | 1 |
| hsa-mir-380    | 2 | hsa-mir-298     | 1 |
| hsa-mir-4306   | 2 | hsa-mir-3116-1  | 1 |
| hsa-mir-4417   | 2 | hsa-mir-3122    | 1 |
| hsa-mir-4504   | 2 | hsa-mir-3125    | 1 |

|                |   |               |   |
|----------------|---|---------------|---|
| hsa-mir-4529   | 2 | hsa-mir-3159  | 1 |
| hsa-mir-4710   | 2 | hsa-mir-3169  | 1 |
| hsa-mir-4749   | 2 | hsa-mir-3187  | 1 |
| hsa-mir-4763   | 2 | hsa-mir-3194  | 1 |
| hsa-mir-483    | 2 | hsa-mir-3612  | 1 |
| hsa-mir-5047   | 2 | hsa-mir-3620  | 1 |
| hsa-mir-518b   | 2 | hsa-mir-3646  | 1 |
| hsa-mir-520b   | 2 | hsa-mir-3648  | 1 |
| hsa-mir-548c   | 2 | hsa-mir-3653  | 1 |
| hsa-mir-549    | 2 | hsa-mir-3670  | 1 |
| hsa-mir-551a   | 2 | hsa-mir-3675  | 1 |
| hsa-mir-558    | 2 | hsa-mir-3677  | 1 |
| hsa-mir-5580   | 2 | hsa-mir-371a  | 1 |
| hsa-mir-628    | 2 | hsa-mir-378g  | 1 |
| hsa-mir-656    | 2 | hsa-mir-382   | 1 |
| hsa-mir-9      | 2 | hsa-mir-3917  | 1 |
| hsa-mir-920    | 2 | hsa-mir-3928  | 1 |
| hsa-mir-122    | 1 | hsa-mir-3973  | 1 |
| hsa-mir-1228   | 1 | hsa-mir-409   | 1 |
| hsa-mir-1250   | 1 | hsa-mir-422a  | 1 |
| hsa-mir-1262   | 1 | hsa-mir-4253  | 1 |
| hsa-mir-1281   | 1 | hsa-mir-4261  | 1 |
| hsa-mir-1296   | 1 | hsa-mir-4296  | 1 |
| hsa-mir-1302-1 | 1 | hsa-mir-4299  | 1 |
| hsa-mir-137    | 1 | hsa-mir-4300  | 1 |
| hsa-mir-147b   | 1 | hsa-mir-4306  | 1 |
| hsa-mir-184    | 1 | hsa-mir-4310  | 1 |
| hsa-mir-1915   | 1 | hsa-mir-4311  | 1 |
| hsa-mir-203    | 1 | hsa-mir-432   | 1 |
| hsa-mir-302f   | 1 | hsa-mir-4323  | 1 |
| hsa-mir-3123   | 1 | hsa-mir-4326  | 1 |
| hsa-mir-3155a  | 1 | hsa-mir-4484  | 1 |
| hsa-mir-3157   | 1 | hsa-mir-4517  | 1 |
| hsa-mir-3160-1 | 1 | hsa-mir-4520b | 1 |
| hsa-mir-3173   | 1 | hsa-mir-4532  | 1 |
| hsa-mir-3179   | 1 | hsa-mir-4534  | 1 |
| hsa-mir-3182   | 1 | hsa-mir-4632  | 1 |
| hsa-mir-3195   | 1 | hsa-mir-4654  | 1 |
| hsa-mir-3616   | 1 | hsa-mir-4676  | 1 |
| hsa-mir-3619   | 1 | hsa-mir-4685  | 1 |
| hsa-mir-3620   | 1 | hsa-mir-4687  | 1 |
| hsa-mir-3649   | 1 | hsa-mir-4690  | 1 |
| hsa-mir-365b   | 1 | hsa-mir-4694  | 1 |

|               |   |                |   |
|---------------|---|----------------|---|
| hsa-mir-3678  | 1 | hsa-mir-4697   | 1 |
| hsa-mir-3681  | 1 | hsa-mir-4698   | 1 |
| hsa-mir-376b  | 1 | hsa-mir-4711   | 1 |
| hsa-mir-3913  | 1 | hsa-mir-4713   | 1 |
| hsa-mir-3929  | 1 | hsa-mir-4714   | 1 |
| hsa-mir-3940  | 1 | hsa-mir-4763   | 1 |
| hsa-mir-3941  | 1 | hsa-mir-4781   | 1 |
| hsa-mir-3973  | 1 | hsa-mir-5007   | 1 |
| hsa-mir-410   | 1 | hsa-mir-5009   | 1 |
| hsa-mir-4255  | 1 | hsa-mir-5100   | 1 |
| hsa-mir-4257  | 1 | hsa-mir-5190   | 1 |
| hsa-mir-4258  | 1 | hsa-mir-5192   | 1 |
| hsa-mir-4261  | 1 | hsa-mir-520d   | 1 |
| hsa-mir-4295  | 1 | hsa-mir-525    | 1 |
| hsa-mir-4300  | 1 | hsa-mir-548ar  | 1 |
| hsa-mir-4303  | 1 | hsa-mir-548d-2 | 1 |
| hsa-mir-4309  | 1 | hsa-mir-548f-1 | 1 |
| hsa-mir-4312  | 1 | hsa-mir-549    | 1 |
| hsa-mir-4314  | 1 | hsa-mir-555    | 1 |
| hsa-mir-4319  | 1 | hsa-mir-5579   | 1 |
| hsa-mir-4320  | 1 | hsa-mir-5583-1 | 1 |
| hsa-mir-4322  | 1 | hsa-mir-5583-2 | 1 |
| hsa-mir-4419a | 1 | hsa-mir-5585   | 1 |
| hsa-mir-4419b | 1 | hsa-mir-5695   | 1 |
| hsa-mir-4420  | 1 | hsa-mir-5699   | 1 |
| hsa-mir-4480  | 1 | hsa-mir-603    | 1 |
| hsa-mir-4483  | 1 | hsa-mir-620    | 1 |
| hsa-mir-4488  | 1 | hsa-mir-623    | 1 |
| hsa-mir-4493  | 1 | hsa-mir-642a   | 1 |
| hsa-mir-4506  | 1 | hsa-mir-645    | 1 |
| hsa-mir-4517  | 1 | hsa-mir-659    | 1 |
| hsa-mir-4518  | 1 | hsa-mir-665    | 1 |
| hsa-mir-4520a | 1 | hsa-mir-675    | 1 |
| hsa-mir-4666a | 1 | hsa-mir-9      | 1 |
| hsa-mir-4687  | 1 | hsa-mir-924    | 1 |
| hsa-mir-4690  | 1 |                |   |
| hsa-mir-4692  | 1 |                |   |
| hsa-mir-4700  | 1 |                |   |
| hsa-mir-4701  | 1 |                |   |
| hsa-mir-4709  | 1 |                |   |
| hsa-mir-4724  | 1 |                |   |
| hsa-mir-4746  | 1 |                |   |
| hsa-mir-4765  | 1 |                |   |

|                |   |
|----------------|---|
| hsa-mir-485    | 1 |
| hsa-mir-496    | 1 |
| hsa-mir-4999   | 1 |
| hsa-mir-5006   | 1 |
| hsa-mir-5095   | 1 |
| hsa-mir-511    | 1 |
| hsa-mir-512    | 1 |
| hsa-mir-516a   | 1 |
| hsa-mir-517c   | 1 |
| hsa-mir-518a   | 1 |
| hsa-mir-5192   | 1 |
| hsa-mir-520d   | 1 |
| hsa-mir-544a   | 1 |
| hsa-mir-548al  | 1 |
| hsa-mir-548at  | 1 |
| hsa-mir-548e   | 1 |
| hsa-mir-548h-1 | 1 |
| hsa-mir-548k   | 1 |
| hsa-mir-548x   | 1 |
| hsa-mir-557    | 1 |
| hsa-mir-5571   | 1 |
| hsa-mir-5582   | 1 |
| hsa-mir-5589   | 1 |
| hsa-mir-5686   | 1 |
| hsa-mir-618    | 1 |
| hsa-mir-620    | 1 |
| hsa-mir-624    | 1 |
| hsa-mir-626    | 1 |
| hsa-mir-634    | 1 |
| hsa-mir-637    | 1 |
| hsa-mir-642a   | 1 |
| hsa-mir-643    | 1 |
| hsa-mir-675    | 1 |
| hsa-mir-760    | 1 |
| hsa-mir-889    | 1 |
