# Supplementary material for: High-throughput sequencing of small RNA transcriptomes reveals critical biological features targeted by microRNAs in cell models used for squamous cell cancer research
Source: PubMed Central journal article supplement (PMC3870990; doi:10.1186/1471-2164-14-735), 2013-10-26
Supplement: 1471-2164-14-735-S2.pdf [file 1471-2164-14-735-S2.pdf]

**Additional File 2A**

| <b>ID</b>                        | <b>Gene Target</b> | <b>Source</b>                      |
|----------------------------------|--------------------|------------------------------------|
| hsa-mir-205 (seed CCUUCAU)       | ATP1A1             | miRecords                          |
| hsa-mir-205                      | DOK4               | TargetScan Human,miRecords         |
| hsa-mir-205                      | ERBB3              | TargetScan Human,miRecords         |
| hsa-mir-205                      | INPPL1             | TargetScan Human,miRecords         |
| hsa-mir-205                      | MED1               | TargetScan Human,miRecords         |
| hsa-mir-205                      | PRKCE              | TargetScan Human,miRecords         |
| hsa-mir-205                      | PTEN               | TargetScan Human,miRecords         |
| hsa-mir-205                      | TRPS1              | TargetScan Human                   |
| hsa-mir-205                      | VEGFA              | TargetScan Human,miRecords         |
| hsa-mir-205                      | ZEB1               | TargetScan Human,miRecords         |
| hsa-mir-205                      | ZEB2               | miRecords                          |
| <b>hsa-mir-24 (seed GGCUCAG)</b> | ACVR1B             | TarBase,TargetScan Human,miRecords |
| hsa-mir-24                       | AURKB              | miRecords                          |
| hsa-mir-24                       | BRCA1              | miRecords                          |
| hsa-mir-24                       | CCNA2              | miRecords                          |
| hsa-mir-24                       | CDK1               | miRecords                          |
| hsa-mir-24                       | CDK4               | miRecords                          |
| hsa-mir-24                       | CDKN2A             | TarBase,miRecords                  |
| hsa-mir-24                       | DHFR               | TarBase,miRecords                  |
| hsa-mir-24                       | E2F2               | miRecords                          |
| hsa-mir-24                       | FEN1               | miRecords                          |
| hsa-mir-24                       | FURIN              | TargetScan Human                   |
| hsa-mir-24                       | MAP2K4             | miRecords                          |
| hsa-mir-24                       | MAPK14             | TarBase,TargetScan Human,miRecords |
| hsa-mir-24                       | MYC                | TargetScan Human,miRecords         |
| hsa-mir-24                       | NOTCH1             | TarBase                            |
| hsa-mir-24                       | SMAD3              | miRecords                          |
| hsa-mir-24                       | SMAD4              | miRecords                          |
| hsa-mir-24                       | SMAD5              | miRecords                          |
| <b>hsa-mir-21 (seed AGCUUAU)</b> | ACTA2              | miRecords                          |
| hsa-mir-21                       | APAF1              | miRecords                          |
| hsa-mir-21                       | BMPR2              | TargetScan Human,miRecords         |
| hsa-mir-21                       | BTG2               | TargetScan Human,miRecords         |
| hsa-mir-21                       | CDC25A             | TargetScan Human,miRecords         |
| hsa-mir-21                       | CDK6               | TargetScan Human,miRecords         |
| hsa-mir-21                       | CDKN1A             | miRecords                          |

|                   |          |                                       |
|-------------------|----------|---------------------------------------|
| <b>hsa-mir-21</b> | CFL2     | TargetScan Human,miRecords            |
| <b>hsa-mir-21</b> | E2F1     | miRecords                             |
| <b>hsa-mir-21</b> | FAM3C    | TargetScan Human,miRecords            |
| <b>hsa-mir-21</b> | FAS      | miRecords                             |
| <b>hsa-mir-21</b> | FASLG    | TargetScan Human                      |
| <b>hsa-mir-21</b> | GLCCI1   | TargetScan Human,miRecords            |
| <b>hsa-mir-21</b> | HIPK3    | miRecords                             |
| <b>hsa-mir-21</b> | IL6R     | TargetScan Human,miRecords            |
| <b>hsa-mir-21</b> | JAG1     | TargetScan Human,miRecords            |
| <b>hsa-mir-21</b> | LRRFIP1  | miRecords                             |
| <b>hsa-mir-21</b> | MARCKS   | miRecords                             |
| <b>hsa-mir-21</b> | MTAP     | TargetScan Human,miRecords            |
| <b>hsa-mir-21</b> | NFIB     | TargetScan Human,miRecords            |
| <b>hsa-mir-21</b> | PDCD4    | TarBase,TargetScan<br>Human,miRecords |
| <b>hsa-mir-21</b> | PELI1    | TargetScan Human,miRecords            |
| <b>hsa-mir-21</b> | PIK3R1   | TargetScan Human                      |
| <b>hsa-mir-21</b> | PRRG4    | TargetScan Human,miRecords            |
| <b>hsa-mir-21</b> | PTEN     | TarBase,miRecords                     |
| <b>hsa-mir-21</b> | RECK     | TargetScan Human,miRecords            |
| <b>hsa-mir-21</b> | RP2      | TargetScan Human,miRecords            |
| <b>hsa-mir-21</b> | SERPINB5 | TarBase,TargetScan<br>Human,miRecords |
| <b>hsa-mir-21</b> | SESN1    | TargetScan Human,miRecords            |
| <b>hsa-mir-21</b> | SLC16A10 | TargetScan Human,miRecords            |
| <b>hsa-mir-21</b> | SOCS5    | miRecords                             |
| <b>hsa-mir-21</b> | SOX5     | TargetScan Human,miRecords            |
| <b>hsa-mir-21</b> | SPRY2    | TargetScan Human,miRecords            |
| <b>hsa-mir-21</b> | TAGLN    | miRecords                             |
| <b>hsa-mir-21</b> | TGFBR2   | TargetScan Human,miRecords            |
| <b>hsa-mir-21</b> | TIMP3    | TargetScan Human,miRecords            |
| <b>hsa-mir-21</b> | TPM1     | TarBase,miRecords                     |

## Additional File 2B

| <b>KEGG pathways and Gene Ontology term enrichment analysis of miR-21, miR-24 and miR-205 validated gene targets</b> |                                                                                                                                             |                              |
|----------------------------------------------------------------------------------------------------------------------|---------------------------------------------------------------------------------------------------------------------------------------------|------------------------------|
| <b>Term</b>                                                                                                          | <b>Genes</b>                                                                                                                                | <b>FDR corrected p value</b> |
| <b>hsa04115<br/>p53 signaling pathway</b>                                                                            | CDK1, CDKN1A, CDKN2A, SERPINB5, CDK6, APAF1, FAS, CDK4, SESN1, PTEN                                                                         | 2.63E-06                     |
| <b>hsa04110<br/>Cell cycle</b>                                                                                       | E2F1, E2F2, CDK1, CDKN1A, CDKN2A, SMAD4, SMAD3, CDK6, CDK4, CCNA2, MYC, CDC25A                                                              | 3.01E-06                     |
| <b>GO:0042127<br/>regulation of cell proliferation</b>                                                               | ERBB3, TGFBR2, SMAD4, BMPR2, SMAD3, CDK6, IL6R, JAG1, ZEB1, CDK4, PTEN, SESN1, BRCA1, NOTCH1, CDKN1A, CDKN2A, BTG2, VEGFA, MYC, CCNA2, NFIB | 1.17E-07                     |
| <b>GO:0051726<br/>regulation of cell cycle</b>                                                                       | E2F1, E2F2, CDK1, SMAD3, CDK6, CDK4, PTEN, PDCD4, CDC25A, BRCA1, CDKN1A, CDKN2A, MAPK14, MYC, CCNA2                                         | 2.16E-07                     |
| <b>GO:0042981<br/>regulation of apoptosis</b>                                                                        | CDK1, ERBB3, SMAD3, FASLG, IL6R, PRKCE, FURIN, PTEN, TIMP3, BRCA1, ACVR1B, NOTCH1, CDKN1A, CDKN2A, BTG2, HIPK3, VEGFA, APAF1, FAS, MYC      | 1.36E-06                     |
| <b>GO:0043067<br/>regulation of programmed cell death</b>                                                            | CDK1, ERBB3, SMAD3, FASLG, IL6R, PRKCE, FURIN, PTEN, TIMP3, BRCA1, ACVR1B, NOTCH1, CDKN1A, CDKN2A, BTG2, HIPK3, VEGFA, APAF1, FAS, MYC      | 1.61E-06                     |
| <b>GO:0010941<br/>regulation of cell death</b>                                                                       | CDK1, ERBB3, SMAD3, FASLG, IL6R, PRKCE, FURIN, PTEN, TIMP3, BRCA1, ACVR1B, NOTCH1, CDKN1A, CDKN2A, BTG2, HIPK3, VEGFA, APAF1, FAS, MYC      | 1.71E-06                     |
