# Supplementary material for: High-throughput sequencing of small RNA transcriptomes reveals critical biological features targeted by microRNAs in cell models used for squamous cell cancer research
Source: PubMed Central journal article supplement (PMC3870990; doi:10.1186/1471-2164-14-735), 2013-10-26
Supplement: 1471-2164-14-735-S3.pdf [file 1471-2164-14-735-S3.pdf]

Additional File 3

| <b>miRNAs</b>  | <b>Mostly expressed in keratinocytes</b> | <b>miRNAs</b>  | <b>Mostly expressed in the cell line</b> |
|----------------|------------------------------------------|----------------|------------------------------------------|
| hsa-mir-409    | 25.11                                    | hsa-mir-129-2  | 2.03                                     |
| hsa-mir-3545   | 22.70                                    | hsa-mir-558    | 2.03                                     |
| hsa-mir-495    | 19.94                                    | hsa-mir-4301   | 2.03                                     |
| hsa-mir-376c   | 17.85                                    | hsa-mir-17     | 2.05                                     |
| hsa-mir-379    | 17.73                                    | hsa-mir-132    | 2.13                                     |
| hsa-mir-376a   | 16.62                                    | hsa-mir-103a-2 | 2.19                                     |
| hsa-mir-296    | 16.25                                    | hsa-mir-619    | 2.20                                     |
| hsa-mir-382    | 15.51                                    | hsa-mir-15a    | 2.26                                     |
| hsa-mir-708    | 13.79                                    | hsa-mir-196a   | 2.32                                     |
| hsa-mir-4305   | 8.13                                     | hsa-mir-16-1   | 2.43                                     |
| hsa-mir-5572   | 7.19                                     | hsa-mir-100    | 2.49                                     |
| hsa-mir-214    | 6.87                                     | hsa-mir-1227   | 2.71                                     |
| hsa-mir-199a   | 6.73                                     | hsa-mir-1302-1 | 2.71                                     |
| hsa-mir-1306   | 6.65                                     | hsa-mir-1972   | 2.71                                     |
| hsa-mir-3120   | 6.65                                     | hsa-mir-3157   | 2.71                                     |
| hsa-mir-125b   | 5.57                                     | hsa-mir-3681   | 2.71                                     |
| hsa-mir-494    | 5.54                                     | hsa-mir-3913   | 2.71                                     |
| hsa-mir-3653   | 5.17                                     | hsa-mir-4480   | 2.71                                     |
| hsa-mir-34c    | 4.80                                     | hsa-mir-544a   | 2.71                                     |
| hsa-mir-127    | 4.43                                     | hsa-mir-30c-1  | 2.78                                     |
| hsa-mir-144    | 4.43                                     | hsa-mir-181b-1 | 2.84                                     |
| hsa-let-7i     | 4.19                                     | hsa-mir-940    | 2.93                                     |
| hsa-mir-135b   | 4.06                                     | hsa-mir-20a    | 2.96                                     |
| hsa-mir-4315   | 3.94                                     | hsa-mir-301a   | 3.36                                     |
| hsa-mir-138-2  | 3.73                                     | hsa-mir-548c   | 3.38                                     |
| hsa-mir-4484   | 3.69                                     | hsa-mir-551a   | 3.38                                     |
| hsa-mir-548ar  | 3.69                                     | hsa-mir-4419b  | 4.06                                     |
| hsa-mir-659    | 3.69                                     | hsa-mir-4999   | 4.06                                     |
| hsa-mir-29c    | 3.49                                     | hsa-mir-511    | 4.06                                     |
| hsa-mir-130a   | 3.43                                     | hsa-mir-628    | 4.06                                     |
| hsa-mir-1249   | 3.32                                     | hsa-mir-181a-1 | 4.98                                     |
| hsa-mir-3663   | 3.32                                     | hsa-mir-7      | 6.47                                     |
| hsa-mir-543    | 3.32                                     | hsa-mir-181d   | 6.54                                     |
| hsa-mir-193a   | 3.19                                     | hsa-mir-10a    | 6.77                                     |
| hsa-mir-4302   | 3.10                                     | hsa-mir-3940   | 6.77                                     |
| hsa-mir-33a    | 2.95                                     | hsa-mir-4724   | 6.77                                     |
| hsa-mir-4323   | 2.95                                     | hsa-mir-4521   | 7.16                                     |
| hsa-mir-548d-2 | 2.95                                     | hsa-mir-4700   | 8.12                                     |
| hsa-mir-27a    | 2.79                                     | hsa-mir-181c   | 8.97                                     |
| hsa-mir-3184   | 2.77                                     | hsa-mir-4493   | 9.48                                     |

|                      |      |                    |       |
|----------------------|------|--------------------|-------|
| <b>hsa-mir-378i</b>  | 2.70 | <b>hsa-mir-935</b> | 11.17 |
| <b>hsa-mir-1260b</b> | 2.59 | <b>hsa-mir-210</b> | 23.79 |
| <b>hsa-mir-215</b>   | 2.59 |                    |       |
| <b>hsa-mir-769</b>   | 2.59 |                    |       |
| <b>hsa-mir-29b-2</b> | 2.53 |                    |       |
| <b>hsa-mir-92b</b>   | 2.46 |                    |       |
| <b>hsa-mir-22</b>    | 2.46 |                    |       |
| <b>hsa-mir-34a</b>   | 2.40 |                    |       |
| <b>hsa-mir-193b</b>  | 2.37 |                    |       |
| <b>hsa-mir-133a</b>  | 2.35 |                    |       |
| <b>hsa-let-7b</b>    | 2.32 |                    |       |
| <b>hsa-mir-1</b>     | 2.23 |                    |       |
| <b>hsa-mir-200c</b>  | 2.22 |                    |       |
| <b>hsa-mir-454</b>   | 2.22 |                    |       |
| <b>hsa-mir-3646</b>  | 2.22 |                    |       |
| <b>hsa-mir-422a</b>  | 2.22 |                    |       |
| <b>hsa-mir-423</b>   | 2.22 |                    |       |
| <b>hsa-mir-629</b>   | 2.22 |                    |       |
| <b>hsa-mir-762</b>   | 2.22 |                    |       |
| <b>hsa-mir-150</b>   | 2.10 |                    |       |
| <b>hsa-mir-328</b>   | 2.07 |                    |       |
| <b>hsa-mir-101-1</b> | 2.06 |                    |       |
| <b>hsa-mir-34b</b>   | 2.05 |                    |       |
| <b>hsa-mir-136</b>   | 2.03 |                    |       |
| <b>hsa-mir-451a</b>  | 2.01 |                    |       |
