# Supplementary material for: High-throughput sequencing of small RNA transcriptomes reveals critical biological features targeted by microRNAs in cell models used for squamous cell cancer research
Source: PubMed Central journal article supplement (PMC3870990; doi:10.1186/1471-2164-14-735), 2013-10-26
Supplement: 1471-2164-14-735-S4.pdf [file 1471-2164-14-735-S4.pdf]

#### Additional File 4A

| <b>ID</b>                | <b>Gene Target</b> | <b>Source</b>                         |
|--------------------------|--------------------|---------------------------------------|
| hsa-mir-1 (seed GGAAUGU) | ABHD11             | TarBase                               |
| hsa-mir-1 (seed GGAAUGU) | ACPL2              | TarBase,TargetScan<br>Human,miRecords |
| hsa-mir-1 (seed GGAAUGU) | ADAR               | TarBase,TargetScan<br>Human,miRecords |
| hsa-mir-1 (seed GGAAUGU) | ADPGK              | TarBase,TargetScan Human              |
| hsa-mir-1 (seed GGAAUGU) | AGMAT              | TarBase                               |
| hsa-mir-1 (seed GGAAUGU) | AGRN               | TarBase                               |
| hsa-mir-1 (seed GGAAUGU) | ANKIB1             | TarBase,TargetScan<br>Human,miRecords |
| hsa-mir-1 (seed GGAAUGU) | ANKRD29            | TarBase,TargetScan<br>Human,miRecords |
| hsa-mir-1 (seed GGAAUGU) | ANP32B             | TarBase,TargetScan Human              |
| hsa-mir-1 (seed GGAAUGU) | ANPEP              | TarBase                               |
| hsa-mir-1 (seed GGAAUGU) | ANXA2              | TarBase,TargetScan Human              |
| hsa-mir-1 (seed GGAAUGU) | AP3B1              | TarBase                               |
| hsa-mir-1 (seed GGAAUGU) | AP3D1              | TarBase,TargetScan Human              |
| hsa-mir-1 (seed GGAAUGU) | ARCN1              | TarBase,TargetScan<br>Human,miRecords |
| hsa-mir-1 (seed GGAAUGU) | ARF3               | TarBase,TargetScan<br>Human,miRecords |
| hsa-mir-1 (seed GGAAUGU) | ARF4               | TarBase,miRecords                     |
| hsa-mir-1 (seed GGAAUGU) | ARHGAP29           | TarBase,miRecords                     |
| hsa-mir-1 (seed GGAAUGU) | ARHGEF18           | TarBase,TargetScan<br>Human,miRecords |
| hsa-mir-1 (seed GGAAUGU) | ARID1A             | TarBase                               |
| hsa-mir-1 (seed GGAAUGU) | ARID2              | TarBase,TargetScan Human              |
| hsa-mir-1 (seed GGAAUGU) | ASH2L              | TarBase,TargetScan Human              |
| hsa-mir-1 (seed GGAAUGU) | ATP6VOA1           | TarBase                               |
| hsa-mir-1 (seed GGAAUGU) | ATP6V1B2           | TargetScan Human,miRecords            |
| hsa-mir-1 (seed GGAAUGU) | AXL                | TarBase,TargetScan<br>Human,miRecords |
| hsa-mir-1 (seed GGAAUGU) | BCKDHB             | TarBase                               |
| hsa-mir-1 (seed GGAAUGU) | BCL2               | miRecords                             |
| hsa-mir-1 (seed GGAAUGU) | BDNF               | TarBase,TargetScan<br>Human,miRecords |
| hsa-mir-1 (seed GGAAUGU) | BLCAP              | TarBase,TargetScan<br>Human,miRecords |
| hsa-mir-1 (seed GGAAUGU) | BRI3BP             | TarBase                               |
| hsa-mir-1 (seed GGAAUGU) | C12orf49           | TarBase,miRecords                     |
| hsa-mir-1 (seed GGAAUGU) | C1orf56            | TarBase,miRecords                     |
| hsa-mir-1 (seed GGAAUGU) | C1orf96            | TarBase,TargetScan                    |

|                                 |                              |                                       |
|---------------------------------|------------------------------|---------------------------------------|
|                                 |                              | Human,miRecords                       |
| <b>hsa-mir-1 (seed GGAAUGU)</b> | Calm1                        | miRecords                             |
| <b>hsa-mir-1 (seed GGAAUGU)</b> | CAND1                        | TarBase,miRecords                     |
| <b>hsa-mir-1 (seed GGAAUGU)</b> | CAP1                         | TarBase,TargetScan<br>Human,miRecords |
| <b>hsa-mir-1 (seed GGAAUGU)</b> | CDCP1                        | TarBase                               |
| <b>hsa-mir-1 (seed GGAAUGU)</b> | CDK14                        | TarBase,TargetScan<br>Human,miRecords |
| <b>hsa-mir-1 (seed GGAAUGU)</b> | CDK9                         | TargetScan Human,miRecords            |
| <b>hsa-mir-1 (seed GGAAUGU)</b> | CERS2                        | TarBase,TargetScan<br>Human,miRecords |
| <b>hsa-mir-1 (seed GGAAUGU)</b> | CHST11                       | TarBase,TargetScan<br>Human,miRecords |
| <b>hsa-mir-1 (seed GGAAUGU)</b> | CHSY1                        | TarBase,TargetScan<br>Human,miRecords |
| <b>hsa-mir-1 (seed GGAAUGU)</b> | CLCN3                        | TarBase,TargetScan<br>Human,miRecords |
| <b>hsa-mir-1 (seed GGAAUGU)</b> | CNN3                         | TargetScan Human,miRecords            |
| <b>hsa-mir-1 (seed GGAAUGU)</b> | CNOT6                        | TarBase,miRecords                     |
| <b>hsa-mir-1 (seed GGAAUGU)</b> | COIL                         | TarBase,TargetScan Human              |
| <b>hsa-mir-1 (seed GGAAUGU)</b> | CORO1C                       | TarBase,TargetScan Human              |
| <b>hsa-mir-1 (seed GGAAUGU)</b> | CPOX                         | TarBase                               |
| <b>hsa-mir-1 (seed GGAAUGU)</b> | CSRP1                        | TarBase                               |
| <b>hsa-mir-1 (seed GGAAUGU)</b> | CTSC                         | TarBase                               |
| <b>hsa-mir-1 (seed GGAAUGU)</b> | DDX5                         | TarBase,TargetScan<br>Human,miRecords |
| <b>hsa-mir-1 (seed GGAAUGU)</b> | DHX15                        | TarBase,TargetScan<br>Human,miRecords |
| <b>hsa-mir-1 (seed GGAAUGU)</b> | DNAJB1                       | TarBase                               |
| <b>hsa-mir-1 (seed GGAAUGU)</b> | EGFR                         | TarBase                               |
| <b>hsa-mir-1 (seed GGAAUGU)</b> | EHMT1                        | TarBase                               |
| <b>hsa-mir-1 (seed GGAAUGU)</b> | EHMT2 (includes<br>EG:10919) | TarBase,TargetScan Human              |
| <b>hsa-mir-1 (seed GGAAUGU)</b> | EML4                         | TarBase,TargetScan<br>Human,miRecords |
| <b>hsa-mir-1 (seed GGAAUGU)</b> | EPB41L4B                     | TarBase,TargetScan<br>Human,miRecords |
| <b>hsa-mir-1 (seed GGAAUGU)</b> | ESR1                         | TarBase,miRecords                     |
| <b>hsa-mir-1 (seed GGAAUGU)</b> | F2                           | TarBase                               |
| <b>hsa-mir-1 (seed GGAAUGU)</b> | FAM57A                       | TarBase,miRecords                     |
| <b>hsa-mir-1 (seed GGAAUGU)</b> | FAM81A                       | TarBase,miRecords                     |
| <b>hsa-mir-1 (seed GGAAUGU)</b> | FBLN2                        | TarBase,TargetScan<br>Human,miRecords |
| <b>hsa-mir-1 (seed GGAAUGU)</b> | FERMT2                       | TarBase                               |

|                                 |               |                                    |
|---------------------------------|---------------|------------------------------------|
| <b>hsa-mir-1 (seed GGAAUGU)</b> | FOXP1         | TargetScan Human,miRecords         |
| <b>hsa-mir-1 (seed GGAAUGU)</b> | FSTL1         | TarBase,miRecords                  |
| <b>hsa-mir-1 (seed GGAAUGU)</b> | G6PD          | TarBase,TargetScan Human,miRecords |
| <b>hsa-mir-1 (seed GGAAUGU)</b> | GAK           | TarBase,TargetScan Human           |
| <b>hsa-mir-1 (seed GGAAUGU)</b> | GCFC2         | TarBase,miRecords                  |
| <b>hsa-mir-1 (seed GGAAUGU)</b> | GCH1          | TarBase,TargetScan Human,miRecords |
| <b>hsa-mir-1 (seed GGAAUGU)</b> | GJA1          | TarBase,TargetScan Human,miRecords |
| <b>hsa-mir-1 (seed GGAAUGU)</b> | GNPDA2        | TarBase,TargetScan Human,miRecords |
| <b>hsa-mir-1 (seed GGAAUGU)</b> | GNPNAT1       | TarBase,TargetScan Human           |
| <b>hsa-mir-1 (seed GGAAUGU)</b> | GOLGA7        | TarBase                            |
| <b>hsa-mir-1 (seed GGAAUGU)</b> | GPD2          | TarBase,TargetScan Human           |
| <b>hsa-mir-1 (seed GGAAUGU)</b> | H3F3A/H3F3B   | TarBase,TargetScan Human,miRecords |
| <b>hsa-mir-1 (seed GGAAUGU)</b> | HAND2         | TarBase,TargetScan Human,miRecords |
| <b>hsa-mir-1 (seed GGAAUGU)</b> | HCN2          | TarBase,miRecords                  |
| <b>hsa-mir-1 (seed GGAAUGU)</b> | HCN4          | TarBase,miRecords                  |
| <b>hsa-mir-1 (seed GGAAUGU)</b> | HDAC4         | TarBase,TargetScan Human,miRecords |
| <b>hsa-mir-1 (seed GGAAUGU)</b> | HIST1H3A      | TarBase,miRecords                  |
| <b>hsa-mir-1 (seed GGAAUGU)</b> | HPS4          | TarBase,TargetScan Human,miRecords |
| <b>hsa-mir-1 (seed GGAAUGU)</b> | HSPA1A/HSPA1B | TarBase,miRecords                  |
| <b>hsa-mir-1 (seed GGAAUGU)</b> | HSPD1         | TarBase,TargetScan Human,miRecords |
| <b>hsa-mir-1 (seed GGAAUGU)</b> | IFT52         | TarBase,TargetScan Human,miRecords |
| <b>hsa-mir-1 (seed GGAAUGU)</b> | IGF1          | TargetScan Human,miRecords         |
| <b>hsa-mir-1 (seed GGAAUGU)</b> | INPP5F        | TarBase,miRecords                  |
| <b>hsa-mir-1 (seed GGAAUGU)</b> | IP6K2         | TarBase,TargetScan Human,miRecords |
| <b>hsa-mir-1 (seed GGAAUGU)</b> | IQGAP3        | TarBase                            |
| <b>hsa-mir-1 (seed GGAAUGU)</b> | IRX5          | miRecords                          |
| <b>hsa-mir-1 (seed GGAAUGU)</b> | ISY1          | TarBase,miRecords                  |
| <b>hsa-mir-1 (seed GGAAUGU)</b> | ITGB4         | TarBase                            |
| <b>hsa-mir-1 (seed GGAAUGU)</b> | KCNE1         | miRecords                          |
| <b>hsa-mir-1 (seed GGAAUGU)</b> | KCNJ2         | TarBase,TargetScan Human,miRecords |
| <b>hsa-mir-1 (seed GGAAUGU)</b> | KCNQ1         | TarBase                            |
| <b>hsa-mir-1 (seed GGAAUGU)</b> | KIAA1598      | TarBase,miRecords                  |

|                                 |          |                                       |
|---------------------------------|----------|---------------------------------------|
| <b>hsa-mir-1 (seed GGAAUGU)</b> | KIF2A    | TarBase,TargetScan<br>Human,miRecords |
| <b>hsa-mir-1 (seed GGAAUGU)</b> | KLHDC5   | TarBase,TargetScan<br>Human,miRecords |
| <b>hsa-mir-1 (seed GGAAUGU)</b> | LARP4    | TargetScan Human,miRecords            |
| <b>hsa-mir-1 (seed GGAAUGU)</b> | LASP1    | TarBase,TargetScan<br>Human,miRecords |
| <b>hsa-mir-1 (seed GGAAUGU)</b> | LIN7C    | TarBase,TargetScan<br>Human,miRecords |
| <b>hsa-mir-1 (seed GGAAUGU)</b> | LRP1     | TarBase                               |
| <b>hsa-mir-1 (seed GGAAUGU)</b> | LRRC8A   | TarBase,TargetScan<br>Human,miRecords |
| <b>hsa-mir-1 (seed GGAAUGU)</b> | LZTFL1   | TarBase,miRecords                     |
| <b>hsa-mir-1 (seed GGAAUGU)</b> | MEF2A    | miRecords                             |
| <b>hsa-mir-1 (seed GGAAUGU)</b> | MET      | TarBase,TargetScan<br>Human,miRecords |
| <b>hsa-mir-1 (seed GGAAUGU)</b> | MGC27345 | TarBase,miRecords                     |
| <b>hsa-mir-1 (seed GGAAUGU)</b> | MMD      | TarBase,TargetScan<br>Human,miRecords |
| <b>hsa-mir-1 (seed GGAAUGU)</b> | MOV10    | TarBase                               |
| <b>hsa-mir-1 (seed GGAAUGU)</b> | MRC2     | TarBase                               |
| <b>hsa-mir-1 (seed GGAAUGU)</b> | MTHFD2   | TarBase                               |
| <b>hsa-mir-1 (seed GGAAUGU)</b> | MTMR12   | TarBase,TargetScan<br>Human,miRecords |
| <b>hsa-mir-1 (seed GGAAUGU)</b> | MTX1     | TarBase,TargetScan<br>Human,miRecords |
| <b>hsa-mir-1 (seed GGAAUGU)</b> | MXD4     | TarBase,TargetScan<br>Human,miRecords |
| <b>hsa-mir-1 (seed GGAAUGU)</b> | NETO2    | TarBase,TargetScan<br>Human,miRecords |
| <b>hsa-mir-1 (seed GGAAUGU)</b> | NOTCH2   | TarBase,TargetScan Human              |
| <b>hsa-mir-1 (seed GGAAUGU)</b> | NOTCH3   | TargetScan Human,miRecords            |
| <b>hsa-mir-1 (seed GGAAUGU)</b> | NRP1     | TarBase,TargetScan Human              |
| <b>hsa-mir-1 (seed GGAAUGU)</b> | OAT      | TarBase,TargetScan<br>Human,miRecords |
| <b>hsa-mir-1 (seed GGAAUGU)</b> | OSBPL7   | TarBase,TargetScan<br>Human,miRecords |
| <b>hsa-mir-1 (seed GGAAUGU)</b> | PDCD4    | TarBase,TargetScan<br>Human,miRecords |
| <b>hsa-mir-1 (seed GGAAUGU)</b> | PDLIM7   | TarBase                               |
| <b>hsa-mir-1 (seed GGAAUGU)</b> | PGM2     | TarBase,TargetScan<br>Human,miRecords |
| <b>hsa-mir-1 (seed GGAAUGU)</b> | PICALM   | TarBase,TargetScan Human              |
| <b>hsa-mir-1 (seed GGAAUGU)</b> | PIM1     | TargetScan Human,miRecords            |
| <b>hsa-mir-1 (seed GGAAUGU)</b> | PLEKHB2  | TarBase,miRecords                     |

|                                 |           |                                       |
|---------------------------------|-----------|---------------------------------------|
| <b>hsa-mir-1 (seed GGAAUGU)</b> | PLEKHG2   | TarBase,miRecords                     |
| <b>hsa-mir-1 (seed GGAAUGU)</b> | PNP       | TarBase,TargetScan<br>Human,miRecords |
| <b>hsa-mir-1 (seed GGAAUGU)</b> | POGK      | TarBase,TargetScan<br>Human,miRecords |
| <b>hsa-mir-1 (seed GGAAUGU)</b> | POLA1     | TarBase,TargetScan<br>Human,miRecords |
| <b>hsa-mir-1 (seed GGAAUGU)</b> | POLA2     | TarBase                               |
| <b>hsa-mir-1 (seed GGAAUGU)</b> | POLR2K    | TarBase,TargetScan<br>Human,miRecords |
| <b>hsa-mir-1 (seed GGAAUGU)</b> | POM121    | miRecords                             |
| <b>hsa-mir-1 (seed GGAAUGU)</b> | POM121C   | TarBase                               |
| <b>hsa-mir-1 (seed GGAAUGU)</b> | PPIB      | TarBase,TargetScan Human              |
| <b>hsa-mir-1 (seed GGAAUGU)</b> | PREX1     | TarBase,TargetScan<br>Human,miRecords |
| <b>hsa-mir-1 (seed GGAAUGU)</b> | PRSS21    | TarBase,TargetScan Human              |
| <b>hsa-mir-1 (seed GGAAUGU)</b> | PTBP1     | TarBase,TargetScan Human              |
| <b>hsa-mir-1 (seed GGAAUGU)</b> | PTBP2     | TarBase                               |
| <b>hsa-mir-1 (seed GGAAUGU)</b> | PTMA      | TarBase,TargetScan Human              |
| <b>hsa-mir-1 (seed GGAAUGU)</b> | PTPLAD1   | TarBase,TargetScan<br>Human,miRecords |
| <b>hsa-mir-1 (seed GGAAUGU)</b> | PTPLB     | TarBase                               |
| <b>hsa-mir-1 (seed GGAAUGU)</b> | PTPRF     | TarBase,TargetScan Human              |
| <b>hsa-mir-1 (seed GGAAUGU)</b> | PWP1      | TarBase                               |
| <b>hsa-mir-1 (seed GGAAUGU)</b> | RAB11FIP2 | TarBase,miRecords                     |
| <b>hsa-mir-1 (seed GGAAUGU)</b> | RABGAP1L  | TarBase,miRecords                     |
| <b>hsa-mir-1 (seed GGAAUGU)</b> | RABL2A    | TarBase,miRecords                     |
| <b>hsa-mir-1 (seed GGAAUGU)</b> | RABL2B    | TarBase,miRecords                     |
| <b>hsa-mir-1 (seed GGAAUGU)</b> | RBM47     | TarBase,TargetScan<br>Human,miRecords |
| <b>hsa-mir-1 (seed GGAAUGU)</b> | RFT1      | TarBase                               |
| <b>hsa-mir-1 (seed GGAAUGU)</b> | RNF138    | TarBase,TargetScan<br>Human,miRecords |
| <b>hsa-mir-1 (seed GGAAUGU)</b> | SAC3D1    | TarBase                               |
| <b>hsa-mir-1 (seed GGAAUGU)</b> | SDC4      | TarBase,miRecords                     |
| <b>hsa-mir-1 (seed GGAAUGU)</b> | SEC23IP   | TarBase                               |
| <b>hsa-mir-1 (seed GGAAUGU)</b> | SERP1     | TarBase,TargetScan<br>Human,miRecords |
| <b>hsa-mir-1 (seed GGAAUGU)</b> | SERPINB5  | TarBase,miRecords                     |
| <b>hsa-mir-1 (seed GGAAUGU)</b> | SFXN1     | TarBase                               |
| <b>hsa-mir-1 (seed GGAAUGU)</b> | SH2D4A    | TarBase,TargetScan<br>Human,miRecords |
| <b>hsa-mir-1 (seed GGAAUGU)</b> | SH3BGRL3  | TarBase,TargetScan Human              |
| <b>hsa-mir-1 (seed GGAAUGU)</b> | SH3PXD2B  | TarBase,TargetScan                    |

|                                 |                           |                                    |
|---------------------------------|---------------------------|------------------------------------|
|                                 |                           | Human,miRecords                    |
| <b>hsa-mir-1 (seed GGAAUGU)</b> | SLC16A9                   | TarBase,miRecords                  |
| <b>hsa-mir-1 (seed GGAAUGU)</b> | SLC25A1                   | TarBase,TargetScan Human           |
| <b>hsa-mir-1 (seed GGAAUGU)</b> | SLC25A22                  | TarBase,TargetScan Human           |
| <b>hsa-mir-1 (seed GGAAUGU)</b> | SLC25A30                  | TarBase,TargetScan Human,miRecords |
| <b>hsa-mir-1 (seed GGAAUGU)</b> | SLC44A1                   | TarBase,TargetScan Human,miRecords |
| <b>hsa-mir-1 (seed GGAAUGU)</b> | SNX6                      | TarBase                            |
| <b>hsa-mir-1 (seed GGAAUGU)</b> | SRSF9                     | TarBase,TargetScan Human,miRecords |
| <b>hsa-mir-1 (seed GGAAUGU)</b> | SRXN1                     | TarBase,TargetScan Human,miRecords |
| <b>hsa-mir-1 (seed GGAAUGU)</b> | SSNA1                     | TarBase                            |
| <b>hsa-mir-1 (seed GGAAUGU)</b> | SYNE1                     | TarBase                            |
| <b>hsa-mir-1 (seed GGAAUGU)</b> | TAC1                      | TarBase,miRecords                  |
| <b>hsa-mir-1 (seed GGAAUGU)</b> | TAGLN2                    | TarBase,TargetScan Human,miRecords |
| <b>hsa-mir-1 (seed GGAAUGU)</b> | TDP1 (includes EG:104884) | TarBase,TargetScan Human,miRecords |
| <b>hsa-mir-1 (seed GGAAUGU)</b> | TH1L                      | TarBase,TargetScan Human,miRecords |
| <b>hsa-mir-1 (seed GGAAUGU)</b> | THBS1                     | TarBase,TargetScan Human           |
| <b>hsa-mir-1 (seed GGAAUGU)</b> | TIMP3                     | TarBase,TargetScan Human,miRecords |
| <b>hsa-mir-1 (seed GGAAUGU)</b> | TMSB10/TMSB4X             | TarBase,TargetScan Human,miRecords |
| <b>hsa-mir-1 (seed GGAAUGU)</b> | TNS4                      | TarBase,miRecords                  |
| <b>hsa-mir-1 (seed GGAAUGU)</b> | TPM1 (includes EG:396366) | TarBase                            |
| <b>hsa-mir-1 (seed GGAAUGU)</b> | TPM2                      | TarBase                            |
| <b>hsa-mir-1 (seed GGAAUGU)</b> | TPM3                      | TarBase,TargetScan Human           |
| <b>hsa-mir-1 (seed GGAAUGU)</b> | TPM4                      | TarBase,TargetScan Human,miRecords |
| <b>hsa-mir-1 (seed GGAAUGU)</b> | TPPP                      | TargetScan Human,miRecords         |
| <b>hsa-mir-1 (seed GGAAUGU)</b> | TRAPPC3                   | TarBase,TargetScan Human,miRecords |
| <b>hsa-mir-1 (seed GGAAUGU)</b> | TRIM2                     | TarBase,TargetScan Human,miRecords |
| <b>hsa-mir-1 (seed GGAAUGU)</b> | TSPAN4                    | TarBase,TargetScan Human,miRecords |
| <b>hsa-mir-1 (seed GGAAUGU)</b> | TWF1 (includes EG:19230)  | TarBase,TargetScan Human,miRecords |
| <b>hsa-mir-1 (seed GGAAUGU)</b> | UHMK1                     | TarBase,TargetScan Human,miRecords |

|                                    |          |                                       |
|------------------------------------|----------|---------------------------------------|
| <b>hsa-mir-1 (seed GGAAUGU)</b>    | UHRF1    | TarBase                               |
| <b>hsa-mir-1 (seed GGAAUGU)</b>    | UNC93B1  | TarBase                               |
| <b>hsa-mir-1 (seed GGAAUGU)</b>    | UST      | TarBase,TargetScan<br>Human,miRecords |
| <b>hsa-mir-1 (seed GGAAUGU)</b>    | UTRN     | TarBase,TargetScan<br>Human,miRecords |
| <b>hsa-mir-1 (seed GGAAUGU)</b>    | WDFY1    | TarBase,TargetScan Human              |
| <b>hsa-mir-1 (seed GGAAUGU)</b>    | WDR11    | TarBase                               |
| <b>hsa-mir-1 (seed GGAAUGU)</b>    | XPNPEP3  | TarBase,TargetScan<br>Human,miRecords |
| <b>hsa-mir-1 (seed GGAAUGU)</b>    | XPO6     | TarBase,TargetScan<br>Human,miRecords |
| <b>hsa-mir-1 (seed GGAAUGU)</b>    | YWHAQ    | TarBase                               |
| <b>hsa-mir-1 (seed GGAAUGU)</b>    | ZNF264   | TarBase,TargetScan<br>Human,miRecords |
| <b>hsa-mir-125b (seed CCCUGAG)</b> | ABTB1    | TarBase,TargetScan Human              |
| <b>hsa-mir-125b (seed CCCUGAG)</b> | ADAMTS1  | miRecords                             |
| <b>hsa-mir-125b (seed CCCUGAG)</b> | AJUBA    | TarBase                               |
| <b>hsa-mir-125b (seed CCCUGAG)</b> | ANAPC16  | TargetScan Human,miRecords            |
| <b>hsa-mir-125b (seed CCCUGAG)</b> | APLN     | TarBase                               |
| <b>hsa-mir-125b (seed CCCUGAG)</b> | ARID3A   | TarBase,TargetScan Human              |
| <b>hsa-mir-125b (seed CCCUGAG)</b> | ARID3B   | TarBase,TargetScan<br>Human,miRecords |
| <b>hsa-mir-125b (seed CCCUGAG)</b> | ATP6AP1L | miRecords                             |
| <b>hsa-mir-125b (seed CCCUGAG)</b> | B3GALT4  | miRecords                             |
| <b>hsa-mir-125b (seed CCCUGAG)</b> | BAK1     | TargetScan Human,miRecords            |
| <b>hsa-mir-125b (seed CCCUGAG)</b> | BMF      | TargetScan Human,miRecords            |
| <b>hsa-mir-125b (seed CCCUGAG)</b> | BMPR1B   | TargetScan Human,miRecords            |
| <b>hsa-mir-125b (seed CCCUGAG)</b> | C9orf86  | TarBase,TargetScan Human              |
| <b>hsa-mir-125b (seed CCCUGAG)</b> | CASP6    | miRecords                             |
| <b>hsa-mir-125b (seed CCCUGAG)</b> | CASP7    | miRecords                             |

|                                |                               |                            |
|--------------------------------|-------------------------------|----------------------------|
| hsa-mir-125b (seed<br>CCCUGAG) | CBLN2                         | miRecords                  |
| hsa-mir-125b (seed<br>CCCUGAG) | CBX7                          | TargetScan Human,miRecords |
| hsa-mir-125b (seed<br>CCCUGAG) | CCR5                          | TargetScan Human           |
| hsa-mir-125b (seed<br>CCCUGAG) | CDC25A                        | miRecords                  |
| hsa-mir-125b (seed<br>CCCUGAG) | CDK6                          | miRecords                  |
| hsa-mir-125b (seed<br>CCCUGAG) | CDKN2A                        | miRecords                  |
| hsa-mir-125b (seed<br>CCCUGAG) | CEBPG                         | miRecords                  |
| hsa-mir-125b (seed<br>CCCUGAG) | CYP1A1                        | miRecords                  |
| hsa-mir-125b (seed<br>CCCUGAG) | DDX19B                        | TarBase                    |
| hsa-mir-125b (seed<br>CCCUGAG) | DICER1                        | TargetScan Human,miRecords |
| hsa-mir-125b (seed<br>CCCUGAG) | DIO3                          | miRecords                  |
| hsa-mir-125b (seed<br>CCCUGAG) | DUS1L                         | TarBase,TargetScan Human   |
| hsa-mir-125b (seed<br>CCCUGAG) | E2F3                          | TargetScan Human           |
| hsa-mir-125b (seed<br>CCCUGAG) | ELAVL1                        | TargetScan Human,miRecords |
| hsa-mir-125b (seed<br>CCCUGAG) | ENTPD4                        | TarBase,TargetScan Human   |
| hsa-mir-125b (seed<br>CCCUGAG) | ERBB2                         | TargetScan Human,miRecords |
| hsa-mir-125b (seed<br>CCCUGAG) | ERBB3                         | TargetScan Human,miRecords |
| hsa-mir-125b (seed<br>CCCUGAG) | FAM19A1                       | miRecords                  |
| hsa-mir-125b (seed<br>CCCUGAG) | GPR160                        | TargetScan Human,miRecords |
| hsa-mir-125b (seed<br>CCCUGAG) | H3F3A/H3F3B                   | miRecords                  |
| hsa-mir-125b (seed<br>CCCUGAG) | HIST1H4A<br>(includes others) | TargetScan Human,miRecords |
| hsa-mir-125b (seed<br>CCCUGAG) | ID1                           | miRecords                  |
| hsa-mir-125b (seed<br>CCCUGAG) | ID2                           | miRecords                  |



|                             |                           |                                    |
|-----------------------------|---------------------------|------------------------------------|
| hsa-mir-125b (seed CCCUGAG) | ID3                       | miRecords                          |
| hsa-mir-125b (seed CCCUGAG) | IGFBP3                    | TargetScan Human,miRecords         |
| hsa-mir-125b (seed CCCUGAG) | IL1RN                     | miRecords                          |
| hsa-mir-125b (seed CCCUGAG) | JARID2                    | miRecords                          |
| hsa-mir-125b (seed CCCUGAG) | KRT19 (includes EG:16669) | miRecords                          |
| hsa-mir-125b (seed CCCUGAG) | LIN28A                    | TarBase,TargetScan Human,miRecords |
| hsa-mir-125b (seed CCCUGAG) | MAN1A1                    | miRecords                          |
| hsa-mir-125b (seed CCCUGAG) | MAP2K7                    | TarBase,TargetScan Human           |
| hsa-mir-125b (seed CCCUGAG) | ODZ2                      | miRecords                          |
| hsa-mir-125b (seed CCCUGAG) | PCDHB10                   | miRecords                          |
| hsa-mir-125b (seed CCCUGAG) | PERP                      | miRecords                          |
| hsa-mir-125b (seed CCCUGAG) | PIGR                      | miRecords                          |
| hsa-mir-125b (seed CCCUGAG) | PPT2                      | TarBase                            |
| hsa-mir-125b (seed CCCUGAG) | RBM8A                     | miRecords                          |
| hsa-mir-125b (seed CCCUGAG) | RHEBL1                    | TarBase                            |
| hsa-mir-125b (seed CCCUGAG) | SGPL1                     | TargetScan Human,miRecords         |
| hsa-mir-125b (seed CCCUGAG) | SMO                       | miRecords                          |
| hsa-mir-125b (seed CCCUGAG) | ST18                      | TargetScan Human,miRecords         |
| hsa-mir-125b (seed CCCUGAG) | TOR2A                     | TarBase,TargetScan Human           |
| hsa-mir-125b (seed CCCUGAG) | TP53                      | TargetScan Human,miRecords         |
| hsa-mir-125b (seed CCCUGAG) | TSPAN8                    | miRecords                          |
| hsa-mir-125b (seed CCCUGAG) | UBE2I                     | miRecords                          |
| hsa-mir-125b (seed CCCUGAG) | UGT2B15                   | miRecords                          |

|                             |         |                                    |
|-----------------------------|---------|------------------------------------|
| hsa-mir-125b (seed CCCUGAG) | UGT2B17 | miRecords                          |
| hsa-mir-125b (seed CCCUGAG) | UGT2B28 | miRecords                          |
| hsa-mir-125b (seed CCCUGAG) | ZNF385A | TarBase,TargetScan Human           |
| hsa-mir-133a (seed UUGGUCC) | BCL2L2  | TargetScan Human                   |
| hsa-mir-133a (seed UUGGUCC) | CASP9   | TarBase,miRecords                  |
| hsa-mir-133a (seed UUGGUCC) | CDC42   | miRecords                          |
| hsa-mir-133a (seed UUGGUCC) | CTGF    | TargetScan Human                   |
| hsa-mir-133a (seed UUGGUCC) | FSCN1   | TargetScan Human,miRecords         |
| hsa-mir-133a (seed UUGGUCC) | HCN2    | TarBase,miRecords                  |
| hsa-mir-133a (seed UUGGUCC) | HCN4    | TarBase                            |
| hsa-mir-133a (seed UUGGUCC) | IGF1R   | TargetScan Human,miRecords         |
| hsa-mir-133a (seed UUGGUCC) | KCNE1   | TarBase                            |
| hsa-mir-133a (seed UUGGUCC) | KCNH2   | miRecords                          |
| hsa-mir-133a (seed UUGGUCC) | KCNQ1   | miRecords                          |
| hsa-mir-133a (seed UUGGUCC) | KLF15   | miRecords                          |
| hsa-mir-133a (seed UUGGUCC) | KRT7    | miRecords                          |
| hsa-mir-133a (seed UUGGUCC) | MCL1    | TargetScan Human                   |
| hsa-mir-133a (seed UUGGUCC) | NFATC4  | miRecords                          |
| hsa-mir-133a (seed UUGGUCC) | PITX3   | miRecords                          |
| hsa-mir-133a (seed UUGGUCC) | PKM     | TarBase,miRecords                  |
| hsa-mir-133a (seed UUGGUCC) | PTBP2   | TarBase,TargetScan Human,miRecords |
| hsa-mir-133a (seed UUGGUCC) | RHOA    | miRecords                          |
| hsa-mir-133a (seed UUGGUCC) | RUNX2   | miRecords                          |

|                                    |         |                                    |
|------------------------------------|---------|------------------------------------|
| <b>hsa-mir-133a (seed UUGGUCC)</b> | SRF     | TarBase,miRecords                  |
| <b>hsa-mir-133a (seed UUGGUCC)</b> | TAGLN2  | TargetScan Human                   |
| <b>hsa-mir-133a (seed UUGGUCC)</b> | WHSC2   | TargetScan Human,miRecords         |
| <b>hsa-mir-196a (seed AGGUAGU)</b> | ANXA1   | miRecords                          |
| <b>hsa-mir-196a (seed AGGUAGU)</b> | HOXA7   | TarBase,TargetScan Human,miRecords |
| <b>hsa-mir-196a (seed AGGUAGU)</b> | HOXB8   | TarBase,TargetScan Human,miRecords |
| <b>hsa-mir-196a (seed AGGUAGU)</b> | HOXC8   | TarBase,TargetScan Human,miRecords |
| <b>hsa-mir-196a (seed AGGUAGU)</b> | HOXD8   | TarBase,miRecords                  |
| <b>hsa-mir-196a (seed AGGUAGU)</b> | IKBKB   | miRecords                          |
| <b>hsa-mir-196a (seed AGGUAGU)</b> | KRT5    | TargetScan Human,miRecords         |
| <b>hsa-mir-196a (seed AGGUAGU)</b> | S100A9  | miRecords                          |
| <b>hsa-mir-196a (seed AGGUAGU)</b> | SPRR2C  | miRecords                          |
| <b>hsa-mir-196a (seed AGGUAGU)</b> | ALOX5AP | miRecords                          |
| <b>hsa-mir-196a (seed AGGUAGU)</b> | HIF1A   | TargetScan Human,miRecords         |
| <b>hsa-mir-196a (seed AGGUAGU)</b> | LAMC2   | TarBase,miRecords                  |
| <b>hsa-mir-196a (seed AGGUAGU)</b> | SET     | miRecords                          |
| <b>hsa-mir-196a (seed AGGUAGU)</b> | SIRT1   | TargetScan Human,miRecords         |
| <b>hsa-mir-511 (seed UGUCUUU)</b>  | TLR4    | TargetScan Human                   |
| <b>hsa-mir-7 (seed GGAAGAC)</b>    | EGFR    | TargetScan Human,miRecords         |
| <b>hsa-mir-7 (seed GGAAGAC)</b>    | FOS     | TarBase,miRecords                  |
| <b>hsa-mir-7 (seed GGAAGAC)</b>    | IRS1    | TargetScan Human,miRecords         |
| <b>hsa-mir-7 (seed GGAAGAC)</b>    | IRS2    | TargetScan Human,miRecords         |
| <b>hsa-mir-7 (seed GGAAGAC)</b>    | PAK1    | TargetScan Human,miRecords         |
| <b>hsa-mir-7 (seed GGAAGAC)</b>    | RAF1    | TargetScan Human,miRecords         |
| <b>hsa-mir-7 (seed GGAAGAC)</b>    | SLC17A7 | miRecords                          |
| <b>hsa-mir-7 (seed GGAAGAC)</b>    | SLC3A2  | TargetScan Human,miRecords         |
| <b>hsa-mir-7 (seed GGAAGAC)</b>    | SNCA    | TargetScan Human,miRecords         |

## Additional File 4B

| <b>Gene Ontology Term Enrichment Analysis</b>                                 |                                                                                                                                                                                                                                                                                           |                              |
|-------------------------------------------------------------------------------|-------------------------------------------------------------------------------------------------------------------------------------------------------------------------------------------------------------------------------------------------------------------------------------------|------------------------------|
| <b>Term</b>                                                                   | <b>Genes</b>                                                                                                                                                                                                                                                                              | <b>FDR Corrected p value</b> |
| <b>GO:0042981<br/>regulation of<br/>apoptosis</b>                             | MCL1, ERBB3, PREX1, ERBB2, SNCA, BCL2L2, TLR4, HSPA1A, TIMP3, GCH1, IGF1R, CASP6, BAK1, PLEKHG2, BDNF, CDKN2A, CASP9, BCL2, DDX19B, CHST11, RHOA, THBS1, BMF, IP6K2, EGFR, PTPRF, CEBPG, ARHGEF18, PIM1, ANXA1, TP53, ESR1, IGF1, SIRT1, NOTCH2, SMO, F2, ID3, HSPD1, IKBKB, PERP, IGFBP3 | 2.79E-05                     |
| <b>GO:0043066<br/>negative<br/>regulation of<br/>apoptosis</b>                | EGFR, MCL1, ERBB3, ERBB2, SNCA, PIM1, TP53, ESR1, ANXA1, IGF1, BCL2L2, HSPA1A, NOTCH2, SMO, IGF1R, BDNF, BCL2, CHST11, RHOA, HSPD1, THBS1, IKBKB                                                                                                                                          | 0.01                         |
| <b>GO:0045597<br/>positive<br/>regulation of<br/>cell<br/>differentiation</b> | SH3PXD2B, PTPRF, PDLIM7, SRF, PNP, SMO, BDNF, HIF1A, ID2, BCL2, RHOA, AP3D1, BMPR1B, IGFBP3, RUNX2, AP3B1                                                                                                                                                                                 | 0.02                         |
