# Supplementary material for: High-throughput sequencing of small RNA transcriptomes reveals critical biological features targeted by microRNAs in cell models used for squamous cell cancer research
Source: PubMed Central journal article supplement (PMC3870990; doi:10.1186/1471-2164-14-735), 2013-10-26
Supplement: 1471-2164-14-735-S5.pdf [file 1471-2164-14-735-S5.pdf]

## Additional File 5

| Gene Symbol | p-value (FDR adjusted) | FoldChange SCC25 down vs Keratinocyte | Gene Symbol | p-value (FDR adjusted) | FoldChange SCC25 up vs Keratinocyte |
|-------------|------------------------|---------------------------------------|-------------|------------------------|-------------------------------------|
| KLK12       | 9.06E-04               | 1147                                  | C1S         | 3.90E-03               | 926                                 |
| SPRR2D      | 1.65E-04               | 883                                   | IGFBP3      | 1.17E-03               | 708                                 |
| CYB5A       | 4.77E-03               | 744                                   | LUM         | 4.52E-04               | 236                                 |
| SPRR1B      | 3.10E-03               | 616                                   | IFIT1       | 1.36E-03               | 212                                 |
| RPS4Y1      | 6.40E-03               | 540                                   | LCP1        | 1.08E-03               | 203                                 |
| KRT6B       | 2.55E-03               | 527                                   | GFPT2       | 5.25E-03               | 182                                 |
| SCEL        | 1.73E-03               | 489                                   | BST2        | 1.57E-03               | 157                                 |
| MFAP5       | 2.21E-05               | 451                                   | MUC4        | 1.31E-05               | 124                                 |
| RHCG        | 4.96E-03               | 318                                   | CTHRC1      | 4.93E-03               | 122                                 |
| KRT4        | 3.67E-03               | 250                                   | C1R         | 3.17E-03               | 114                                 |
| SPRR3       | 3.87E-03               | 203                                   | CACNG6      | 3.36E-03               | 108                                 |
| TMPRSS11D   | 2.16E-03               | 193                                   | IFIT2       | 3.43E-03               | 108                                 |
| CDH16       | 4.77E-04               | 147                                   | RSAD2       | 3.85E-03               | 106                                 |
| LEMD1       | 2.01E-03               | 141                                   | AIM2        | 2.84E-03               | 97                                  |
| ALOX15B     | 2.60E-03               | 123                                   | NID2        | 1.20E-04               | 96                                  |
| KLK11       | 5.00E-03               | 116                                   | ZNF114      | 4.61E-03               | 86                                  |
| M14087      | 6.34E-03               | 112                                   | HOXA9       | 1.99E-03               | 85                                  |
| CRNN        | 1.25E-03               | 106                                   | GBP5        | 6.30E-03               | 84                                  |
| COX7A1      | 8.57E-04               | 80                                    | KAL1        | 6.54E-06               | 76                                  |
| SPRR1A      | 1.74E-03               | 78                                    | HTRA3       | 1.68E-04               | 72                                  |
| SPINK5      | 1.43E-03               | 71                                    | INDO        | 1.93E-03               | 70                                  |
| SPRR2C      | 5.70E-03               | 71                                    | CXCL10      | 3.55E-04               | 70                                  |
| FNDC4       | 1.07E-04               | 70                                    | GBP2        | 3.13E-03               | 67                                  |
| UNQ467      | 2.12E-03               | 69                                    | FOXF2       | 7.26E-04               | 65                                  |
| WNT5A       | 3.48E-03               | 64                                    | ETV7        | 1.87E-04               | 59                                  |
| MMP10       | 2.07E-05               | 61                                    | IL4I1       | 4.94E-03               | 57                                  |
| IL1R2       | 2.53E-03               | 57                                    | OAS1        | 2.38E-03               | 55                                  |
| PI3         | 5.23E-03               | 55                                    | IFITM1      | 2.73E-03               | 53                                  |
| TNFRSF6B    | 1.76E-03               | 52                                    | FLI1        | 3.38E-05               | 51                                  |
| ATAD4       | 3.17E-03               | 46                                    | UCHL1       | 2.75E-03               | 50                                  |
| ZNF447      | 6.27E-08               | 41                                    | LYPD1       | 5.39E-03               | 50                                  |
| CD521096    | 1.47E-03               | 40                                    | OASL        | 9.88E-05               | 48                                  |
| ZNF83       | 9.79E-04               | 40                                    | IFI44L      | 2.00E-03               | 46                                  |
| PLD5        | 3.99E-03               | 37                                    | GBP1        | 2.30E-03               | 45                                  |
| S100A8      | 4.60E-03               | 37                                    | RHOBTB3     | 1.70E-06               | 45                                  |
| TFPI2       | 2.01E-03               | 36                                    | DLX4        | 5.17E-05               | 45                                  |
| AREG        | 5.65E-03               | 35                                    | CSAG2       | 3.09E-03               | 44                                  |
| PPP1R3C     | 2.63E-04               | 34                                    | MME         | 2.78E-03               | 43                                  |

|                  |          |    |                 |          |    |
|------------------|----------|----|-----------------|----------|----|
| <b>SLPI</b>      | 1.15E-03 | 33 | <b>DGKG</b>     | 2.45E-05 | 41 |
| <b>HES5</b>      | 1.69E-04 | 33 | <b>CMKOR1</b>   | 7.79E-04 | 41 |
| <b>HS6ST2</b>    | 8.71E-04 | 33 | <b>GDA</b>      | 3.83E-03 | 40 |
| <b>TMPRSS11E</b> | 6.54E-04 | 32 | <b>CXCL11</b>   | 3.89E-03 | 36 |
| <b>KRT16</b>     | 3.85E-03 | 31 | <b>KAZALD1</b>  | 3.53E-03 | 36 |
| <b>TMEM45B</b>   | 9.46E-04 | 30 | <b>WISP3</b>    | 2.14E-03 | 34 |
| <b>TGM1</b>      | 1.46E-05 | 30 | <b>IFI44</b>    | 4.22E-03 | 32 |
| <b>ARRDC4</b>    | 3.20E-04 | 28 | <b>IL6</b>      | 3.91E-03 | 31 |
| <b>ZNF185</b>    | 7.45E-06 | 28 | <b>OLFML2A</b>  | 9.59E-04 | 31 |
| <b>NDN</b>       | 3.28E-03 | 27 | <b>BMF</b>      | 6.42E-03 | 31 |
| <b>CUGBP2</b>    | 2.31E-04 | 26 | <b>GPNMB</b>    | 9.31E-04 | 30 |
| <b>PGLYRP4</b>   | 6.09E-03 | 25 | <b>FLJ14167</b> | 5.54E-03 | 30 |
| <b>ANXA9</b>     | 1.40E-04 | 24 | <b>BIRC4BP</b>  | 1.30E-03 | 30 |
| <b>CAPNS2</b>    | 1.97E-04 | 24 | <b>EGR3</b>     | 2.51E-03 | 29 |
| <b>LXN</b>       | 3.86E-03 | 24 | <b>CTSS</b>     | 8.91E-04 | 28 |
| <b>CSTA</b>      | 4.15E-04 | 23 | <b>CCL5</b>     | 5.74E-03 | 27 |
| <b>CLMN</b>      | 7.32E-04 | 22 | <b>TNFAIP6</b>  | 5.88E-03 | 27 |
| <b>CYP4B1</b>    | 3.89E-03 | 22 | <b>XCL1</b>     | 6.07E-04 | 27 |
| <b>CDKN2A</b>    | 3.90E-04 | 22 | <b>HIST1H1A</b> | 1.14E-03 | 25 |
| <b>KRT13</b>     | 6.28E-03 | 22 | <b>WNT4</b>     | 6.79E-04 | 24 |
| <b>COL1A2</b>    | 2.75E-03 | 22 | <b>CRIP1</b>    | 3.12E-03 | 24 |
| <b>GRHL3</b>     | 6.32E-04 | 22 | <b>ISG15</b>    | 3.49E-03 | 24 |
| <b>AKR1B10</b>   | 2.22E-03 | 21 | <b>PCDHB2</b>   | 1.05E-03 | 24 |
| <b>EPS8L1</b>    | 7.18E-05 | 20 | <b>APOL3</b>    | 1.83E-03 | 23 |
| <b>FEZ1</b>      | 2.58E-03 | 20 | <b>FLJ20035</b> | 2.57E-03 | 23 |
| <b>FMO2</b>      | 8.00E-05 | 20 | <b>PODXL</b>    | 2.64E-03 | 23 |
| <b>EMP1</b>      | 2.67E-05 | 20 | <b>CSAG3A</b>   | 8.27E-04 | 23 |
| <b>LOH11CR2A</b> | 1.34E-04 | 19 | <b>NALP7</b>    | 7.30E-04 | 22 |
| <b>FAM84A</b>    | 1.51E-04 | 19 | <b>NR2E1</b>    | 4.23E-03 | 22 |
| <b>TFCP2L1</b>   | 3.46E-03 | 19 | <b>XCL2</b>     | 6.88E-04 | 22 |
| <b>OSBPL6</b>    | 2.32E-03 | 18 | <b>UGT1A6</b>   | 2.44E-03 | 21 |
| <b>PYGB</b>      | 8.15E-05 | 18 | <b>SIX1</b>     | 9.65E-04 | 21 |
| <b>AIM1L</b>     | 3.82E-03 | 16 | <b>FLJ32255</b> | 1.60E-03 | 20 |
| <b>MAL</b>       | 4.62E-04 | 16 | <b>DUSP2</b>    | 2.08E-03 | 20 |
| <b>CDSN</b>      | 2.52E-03 | 16 | <b>SEPP1</b>    | 3.91E-04 | 20 |
| <b>TMEM139</b>   | 3.38E-03 | 15 | <b>DMN</b>      | 3.67E-03 | 20 |
| <b>LCE3D</b>     | 2.79E-03 | 15 | <b>MYLIP</b>    | 4.16E-03 | 20 |
| <b>LGALS7</b>    | 3.29E-05 | 14 | <b>HOXC13</b>   | 4.75E-03 | 20 |
| <b>TMTC1</b>     | 2.93E-04 | 14 | <b>CSF2</b>     | 5.69E-04 | 19 |
| <b>HSPC159</b>   | 3.90E-03 | 14 | <b>SOD2</b>     | 3.19E-05 | 19 |
| <b>FLJ10916</b>  | 1.50E-04 | 14 | <b>EGLN3</b>    | 4.80E-03 | 18 |
| <b>FLJ36868</b>  | 2.76E-03 | 14 | <b>DPYD</b>     | 5.70E-03 | 18 |
| <b>HSD17B2</b>   | 3.93E-03 | 14 | <b>FAM69B</b>   | 1.63E-03 | 18 |

|                  |          |    |          |          |    |
|------------------|----------|----|----------|----------|----|
| <b>FLJ38020</b>  | 3.52E-03 | 14 | PDGFRL   | 2.82E-04 | 18 |
| <b>MGC102966</b> | 3.74E-05 | 14 | SECTM1   | 1.38E-03 | 18 |
| <b>MIG7</b>      | 5.38E-03 | 13 | MEF2C    | 5.88E-04 | 17 |
| <b>FABP5</b>     | 1.72E-03 | 13 | TCERG1L  | 2.70E-03 | 17 |
| <b>KRT6L</b>     | 6.19E-06 | 13 | RUNX3    | 2.72E-03 | 17 |
| <b>SBEM</b>      | 2.59E-03 | 12 | USP18    | 5.16E-04 | 17 |
| <b>SPRR2B</b>    | 8.91E-04 | 12 | SYTL3    | 1.53E-03 | 17 |
| <b>MTAC2D1</b>   | 1.62E-03 | 11 | BTN3A3   | 5.90E-03 | 17 |
| <b>LMCD1</b>     | 2.79E-03 | 11 | IRF7     | 1.57E-04 | 17 |
| <b>TP53I3</b>    | 2.07E-03 | 11 | MMP7     | 1.46E-03 | 16 |
| <b>VILL</b>      | 2.06E-03 | 11 | SERTAD4  | 3.14E-03 | 16 |
| <b>RHOV</b>      | 4.16E-03 | 11 | TFRC     | 1.46E-04 | 16 |
| <b>KRT33A</b>    | 3.79E-03 | 10 | FLJ42709 | 1.21E-03 | 15 |
| <b>KRT1</b>      | 4.92E-03 | 10 | S73202   | 3.08E-03 | 15 |
| <b>ARMCX1</b>    | 2.30E-03 | 10 | ICAM1    | 2.98E-03 | 15 |
| <b>PKP1</b>      | 2.45E-03 | 10 | TNS3     | 2.27E-03 | 15 |
| <b>ZFP42</b>     | 2.09E-03 | 10 | SPOCK1   | 5.08E-04 | 14 |
| <b>KRT24</b>     | 1.90E-03 | 10 | TDO2     | 2.59E-03 | 13 |
| <b>VLDLR</b>     | 5.70E-03 | 10 | OBSL1    | 2.22E-03 | 13 |
| <b>DIAPH2</b>    | 6.23E-05 | 9  | FBN1     | 2.24E-03 | 13 |
| <b>ERCC1</b>     | 6.18E-05 | 9  | CFI      | 1.21E-05 | 13 |
| <b>OSBPL10</b>   | 3.10E-03 | 9  | IL8      | 5.17E-03 | 13 |
| <b>SMOC1</b>     | 3.50E-04 | 9  | SPP1     | 4.94E-03 | 13 |
| <b>DHRS1</b>     | 4.42E-03 | 9  | TNFSF10  | 5.83E-04 | 13 |
| <b>TGFBR2</b>    | 4.88E-04 | 9  | SPON2    | 6.09E-03 | 13 |
| <b>ANKRD15</b>   | 2.31E-04 | 9  | TNFAIP2  | 4.17E-06 | 13 |
| <b>RARRES1</b>   | 8.49E-04 | 9  | KYNU     | 3.30E-04 | 13 |
| <b>SLC2A11</b>   | 3.71E-04 | 8  | CSAG1    | 1.88E-05 | 13 |
| <b>CSF3</b>      | 7.57E-05 | 8  | EGR1     | 3.80E-03 | 12 |
| <b>MYO5B</b>     | 4.57E-03 | 8  | PREX1    | 3.29E-03 | 12 |
| <b>FAM19A4</b>   | 2.54E-03 | 8  | CFHR3    | 2.62E-03 | 12 |
| <b>S100A4</b>    | 6.18E-03 | 8  | CTSH     | 1.78E-04 | 12 |
| <b>ZFP2</b>      | 4.07E-03 | 8  | PROC     | 4.12E-03 | 12 |
| <b>ELL3</b>      | 6.31E-04 | 8  | CCDC3    | 4.21E-03 | 12 |
| <b>RGS2</b>      | 1.72E-04 | 8  | SLC22A4  | 2.23E-04 | 12 |
| <b>MGC16121</b>  | 9.08E-04 | 8  | PDE4A    | 1.29E-03 | 12 |
| <b>CDH11</b>     | 2.72E-04 | 8  | GPR98    | 5.85E-03 | 12 |
| <b>ASAM</b>      | 1.04E-04 | 8  | CCL28    | 6.97E-04 | 12 |
| <b>ALDH1L2</b>   | 8.43E-04 | 8  | WDR72    | 6.28E-03 | 12 |
| <b>KIAA1305</b>  | 1.88E-03 | 8  | NNMT     | 2.49E-03 | 12 |
| <b>ETHE1</b>     | 2.71E-03 | 8  | OVOS2    | 2.53E-03 | 12 |
| <b>PRKAG2</b>    | 2.29E-03 | 8  | FAM26B   | 3.00E-03 | 12 |
| <b>SH2D5</b>     | 3.12E-03 | 8  | HOXA13   | 1.88E-05 | 11 |

|                  |          |   |          |          |    |
|------------------|----------|---|----------|----------|----|
| <b>RAB11FIP1</b> | 3.32E-03 | 7 | GAS1     | 1.46E-03 | 11 |
| <b>DDX3Y</b>     | 4.06E-05 | 7 | HOXA2    | 1.11E-03 | 11 |
| <b>KCNK12</b>    | 1.50E-04 | 7 | TIGD7    | 6.38E-05 | 11 |
| <b>APOE</b>      | 8.47E-05 | 7 | IGFBP1   | 5.92E-04 | 11 |
| <b>FRAS1</b>     | 8.20E-04 | 7 | MAGEA11  | 7.25E-05 | 11 |
| <b>ASL</b>       | 4.96E-06 | 7 | CDC7     | 5.00E-04 | 11 |
| <b>LZTS1</b>     | 5.90E-03 | 7 | ECM2     | 6.35E-03 | 11 |
| <b>S100A14</b>   | 1.43E-03 | 7 | FLJ22675 | 3.56E-03 | 11 |
| <b>PSCA</b>      | 1.05E-03 | 7 | MLLT11   | 5.14E-04 | 11 |
| <b>PLEKHG5</b>   | 3.55E-03 | 7 | SLC1A3   | 6.05E-03 | 11 |
| <b>KRT14</b>     | 1.99E-03 | 7 | MAGED4   | 2.23E-04 | 11 |
| <b>SERPINE1</b>  | 9.92E-04 | 7 | P2RY6    | 1.04E-03 | 10 |
| <b>BTBD11</b>    | 4.10E-05 | 7 | ID4      | 1.79E-03 | 10 |
| <b>SESN3</b>     | 2.79E-03 | 7 | FGD3     | 1.79E-04 | 10 |
| <b>FUT3</b>      | 2.90E-03 | 7 | TNFRSF9  | 6.56E-04 | 10 |
| <b>MRGPRX3</b>   | 9.06E-04 | 7 | SLITRK6  | 6.18E-03 | 10 |
| <b>PTK6</b>      | 4.08E-03 | 7 | BTN3A2   | 5.69E-04 | 10 |
| <b>TMEM40</b>    | 4.39E-03 | 7 | LRRC38   | 1.30E-04 | 10 |
| <b>THBS2</b>     | 4.83E-05 | 7 | TTK      | 2.74E-04 | 10 |
| <b>NEBL</b>      | 4.01E-03 | 7 | CFH      | 3.17E-03 | 10 |
| <b>KHDRBS3</b>   | 5.56E-03 | 7 | APOBEC3G | 6.39E-04 | 10 |
| <b>FRG1</b>      | 7.81E-04 | 7 | SAMD11   | 3.03E-03 | 10 |
| <b>ADARB1</b>    | 1.22E-03 | 7 | TOP2A    | 1.05E-03 | 10 |
| <b>FAM101A</b>   | 8.01E-04 | 6 | SASS6    | 3.04E-03 | 9  |
| <b>SOX9</b>      | 1.52E-03 | 6 | ATF3     | 8.49E-04 | 9  |
| <b>CSTB</b>      | 2.85E-05 | 6 | CCL26    | 4.62E-03 | 9  |
| <b>ACCN2</b>     | 1.29E-06 | 6 | KRT25    | 4.47E-03 | 9  |
| <b>TM4SF1</b>    | 4.93E-03 | 6 | FLJ30064 | 1.83E-03 | 9  |
| <b>STEAP2</b>    | 1.64E-04 | 6 | KIFC1    | 5.58E-03 | 9  |
| <b>QPCT</b>      | 6.17E-03 | 6 | FAM70A   | 2.35E-03 | 9  |
| <b>LRIG1</b>     | 3.50E-04 | 6 | GPR143   | 9.53E-05 | 9  |
| <b>TMEM28</b>    | 2.59E-04 | 6 | CLSPN    | 2.51E-04 | 9  |
| <b>DPYSL4</b>    | 8.96E-04 | 6 | HHEX     | 3.29E-03 | 9  |
| <b>DOCK8</b>     | 6.26E-03 | 6 | H1FO     | 5.69E-05 | 9  |
| <b>ECHDC3</b>    | 1.24E-03 | 6 | FLJ41747 | 4.78E-03 | 9  |
| <b>TMPRSS13</b>  | 6.22E-03 | 6 | MGC16291 | 1.86E-03 | 9  |
| <b>CAMK2D</b>    | 8.68E-04 | 6 | MICB     | 5.37E-04 | 9  |
| <b>FADS2</b>     | 6.23E-03 | 6 | AMID     | 3.49E-04 | 8  |
| <b>CRYAB</b>     | 1.90E-04 | 6 | FADD     | 2.79E-03 | 8  |
| <b>CTSL2</b>     | 1.36E-03 | 6 | REC8L1   | 2.94E-03 | 8  |
| <b>MGC4172</b>   | 1.64E-04 | 6 | TAP1     | 2.83E-03 | 8  |
| <b>FGF7</b>      | 3.86E-03 | 6 | ARID5A   | 5.52E-04 | 8  |
| <b>STEAP1</b>    | 3.89E-03 | 6 | GIMAP2   | 4.15E-03 | 8  |

|                 |          |   |           |          |   |
|-----------------|----------|---|-----------|----------|---|
| <b>WFDC12</b>   | 9.46E-04 | 5 | PTN       | 3.23E-03 | 8 |
| <b>DNASE1L3</b> | 5.68E-07 | 5 | SLC7A8    | 1.04E-03 | 8 |
| <b>TMEM80</b>   | 4.98E-03 | 5 | NEK2      | 5.96E-04 | 8 |
| <b>PTPLAD2</b>  | 1.68E-04 | 5 | MAP3K8    | 1.64E-03 | 8 |
| <b>VKORC1L1</b> | 6.36E-03 | 5 | HLA-B     | 6.20E-05 | 8 |
| <b>SERPINB1</b> | 4.02E-03 | 5 | KCNQ1     | 4.55E-03 | 8 |
| <b>SRPX</b>     | 2.08E-03 | 5 | USP13     | 1.20E-03 | 8 |
| <b>VNN1</b>     | 3.58E-04 | 5 | MTBP      | 1.24E-03 | 8 |
| <b>RBPMS2</b>   | 6.14E-03 | 5 | PCDH7     | 8.60E-04 | 8 |
| <b>KRT2</b>     | 2.63E-07 | 5 | CD69      | 8.39E-05 | 8 |
| <b>LRAT</b>     | 8.29E-04 | 5 | CPT1B     | 1.40E-04 | 8 |
| <b>LPIN1</b>    | 2.48E-06 | 5 | TLR2      | 1.36E-03 | 8 |
| <b>SH3PXD2A</b> | 4.54E-04 | 5 | DKK1      | 1.69E-06 | 8 |
| <b>SNCA</b>     | 6.18E-03 | 5 | TOX       | 1.23E-03 | 8 |
| <b>YIPF7</b>    | 9.09E-05 | 5 | BHLHB3    | 4.97E-04 | 8 |
| <b>ANXA2P3</b>  | 1.20E-03 | 5 | PCDHB11   | 5.67E-04 | 8 |
| <b>FSTL1</b>    | 2.61E-03 | 5 | CD83      | 3.14E-06 | 8 |
| <b>ZNF295</b>   | 5.77E-03 | 5 | PRTFDC1   | 1.26E-03 | 8 |
| <b>GSN</b>      | 4.85E-04 | 5 | AKAP12    | 3.22E-05 | 8 |
| <b>SERPINF1</b> | 7.41E-04 | 5 | CGI-38    | 4.52E-03 | 8 |
| <b>ZNF545</b>   | 1.60E-03 | 5 | CLDN23    | 2.92E-03 | 8 |
| <b>JAM2</b>     | 1.45E-03 | 5 | KIF18A    | 3.39E-03 | 8 |
| <b>NEO1</b>     | 3.91E-03 | 5 | TMEM45A   | 4.42E-04 | 8 |
| <b>CCDC8</b>    | 6.12E-03 | 5 | ABHD3     | 7.86E-05 | 8 |
| <b>LSS</b>      | 2.34E-04 | 5 | VEGFC     | 9.08E-04 | 7 |
| <b>WIP1</b>     | 1.46E-03 | 5 | MEIS2     | 1.79E-04 | 7 |
| <b>AP1S3</b>    | 9.66E-04 | 5 | SNCAIP    | 4.29E-03 | 7 |
| <b>TM7SF3</b>   | 2.12E-03 | 5 | IFIH1     | 9.59E-04 | 7 |
| <b>NRCAM</b>    | 5.93E-04 | 5 | SLC1A1    | 1.43E-03 | 7 |
| <b>MTL5</b>     | 9.22E-06 | 5 | HIST1H2AL | 2.59E-04 | 7 |
| <b>CRYBB2</b>   | 4.33E-04 | 5 | WNT10A    | 1.93E-04 | 7 |
| <b>PDDC1</b>    | 4.83E-05 | 4 | CDC25C    | 5.79E-04 | 7 |
| <b>FLJ46385</b> | 3.52E-03 | 4 | DLG7      | 4.01E-03 | 7 |
| <b>STAR</b>     | 6.48E-04 | 4 | DHRS2     | 1.62E-06 | 7 |
| <b>CMTM7</b>    | 2.82E-08 | 4 | LMNB1     | 1.81E-03 | 7 |
| <b>PLEKHG1</b>  | 1.94E-04 | 4 | BAG2      | 1.49E-03 | 7 |
| <b>TM7SF2</b>   | 1.40E-04 | 4 | AURKA     | 2.06E-04 | 7 |
| <b>TMEM154</b>  | 3.29E-03 | 4 | MANBA     | 3.43E-03 | 7 |
| <b>EPB41L4B</b> | 6.13E-03 | 4 | KIAA0703  | 5.12E-09 | 7 |
| <b>SLC7A4</b>   | 2.22E-03 | 4 | KRT86     | 2.43E-03 | 7 |
| <b>SPEG</b>     | 4.65E-04 | 4 | SPAG5     | 2.94E-03 | 7 |
| <b>EVPL</b>     | 5.12E-04 | 4 | WFDC2     | 4.71E-03 | 7 |
| <b>ANKRD29</b>  | 2.91E-03 | 4 | ZNF618    | 7.49E-05 | 7 |

|          |          |   |          |          |   |
|----------|----------|---|----------|----------|---|
| CST6     | 4.74E-03 | 4 | PLSCR4   | 6.40E-03 | 7 |
| KCNG1    | 1.20E-06 | 4 | DUOX2    | 6.33E-03 | 7 |
| TMEM16J  | 4.25E-03 | 4 | SKIL     | 6.22E-04 | 7 |
| ROPN1B   | 4.18E-04 | 4 | FLT3LG   | 6.00E-03 | 7 |
| RGS14    | 4.28E-04 | 4 | IL15RA   | 2.60E-04 | 7 |
| GLDC     | 5.24E-03 | 4 | CDC6     | 5.07E-03 | 7 |
| TGFB3    | 3.77E-04 | 4 | KIF2C    | 1.80E-04 | 7 |
| QPRT     | 1.00E-03 | 4 | ALDH2    | 1.67E-03 | 7 |
| WRB      | 3.24E-03 | 4 | FLJ45187 | 2.35E-04 | 7 |
| GPD1L    | 1.93E-03 | 4 | SMC2     | 4.18E-04 | 7 |
| CXCL5    | 3.98E-03 | 4 | MCM10    | 1.01E-03 | 7 |
| BSPRY    | 6.04E-04 | 4 | CENPF    | 5.00E-03 | 7 |
| GNG12    | 1.21E-03 | 4 | EVII     | 4.60E-05 | 6 |
| GSTK1    | 2.49E-03 | 4 | KIF11    | 2.83E-03 | 6 |
| SATB1    | 3.26E-04 | 4 | TNIK     | 6.26E-03 | 6 |
| TMEM98   | 3.88E-05 | 4 | CLDN1    | 3.37E-03 | 6 |
| OVOL2    | 3.49E-03 | 4 | PKN3     | 5.93E-03 | 6 |
| KRT34    | 3.16E-03 | 4 | TTC30B   | 2.50E-03 | 6 |
| PSG4     | 2.88E-03 | 4 | REL      | 7.28E-04 | 6 |
| IDS      | 1.09E-05 | 4 | CXorf57  | 4.01E-04 | 6 |
| DQX1     | 2.08E-03 | 4 | CDCA5    | 3.46E-03 | 6 |
| CYB5R1   | 5.72E-03 | 4 | IGF2     | 1.84E-03 | 6 |
| TMEM160  | 2.86E-03 | 4 | MID1     | 9.93E-04 | 6 |
| FSTL3    | 1.19E-03 | 4 | MASTL    | 3.66E-05 | 6 |
| STYXL1   | 2.71E-03 | 4 | FAM46A   | 8.71E-04 | 6 |
| EMP3     | 4.43E-04 | 4 | WDR64    | 3.00E-03 | 6 |
| TGM2     | 5.90E-03 | 4 | ATG4D    | 3.13E-03 | 6 |
| DECR2    | 3.99E-03 | 4 | ZNF594   | 4.73E-03 | 6 |
| MRAS     | 1.86E-03 | 4 | EXTL2    | 8.50E-05 | 6 |
| SCD      | 2.35E-04 | 4 | DTX3L    | 1.13E-03 | 6 |
| CLTB     | 1.20E-04 | 4 | ACOT4    | 2.08E-04 | 6 |
| ECHDC2   | 1.98E-04 | 4 | HLA-E    | 5.25E-03 | 6 |
| NPR2     | 3.97E-03 | 4 | FOXA1    | 3.32E-03 | 6 |
| PSG1     | 1.01E-04 | 4 | ADM      | 3.85E-03 | 6 |
| KGFLP1   | 2.46E-03 | 4 | CCNL1    | 3.89E-04 | 6 |
| LEPR     | 2.25E-03 | 4 | KIF14    | 9.80E-04 | 6 |
| PDE4B    | 3.95E-03 | 4 | PTGS2    | 4.28E-04 | 6 |
| CITED4   | 3.30E-03 | 4 | PSRC1    | 3.89E-03 | 6 |
| GSG1     | 9.21E-04 | 4 | AURKB    | 5.13E-03 | 6 |
| FLJ41603 | 5.38E-03 | 4 | RDH16    | 1.24E-03 | 6 |
| ANKRD38  | 1.97E-03 | 4 | RAB3IL1  | 9.16E-04 | 6 |
| WNT5B    | 5.85E-03 | 4 | MEGF6    | 2.31E-03 | 6 |
| PPM1F    | 5.30E-03 | 4 | FOXL2    | 1.67E-03 | 6 |

|          |          |   |           |          |   |
|----------|----------|---|-----------|----------|---|
| FLJ43339 | 1.60E-03 | 4 | ATAD2     | 1.18E-06 | 6 |
| HR       | 6.43E-04 | 4 | PHC3      | 2.68E-03 | 6 |
| TMEM132B | 9.05E-04 | 4 | SMC4      | 1.97E-03 | 6 |
| CRELD1   | 7.58E-05 | 4 | PLK1      | 3.55E-04 | 6 |
| X15667   | 1.09E-04 | 4 | KLHL24    | 1.23E-06 | 6 |
| CHKB     | 9.36E-04 | 3 | CDCA3     | 8.30E-04 | 6 |
| PHYHD1   | 2.13E-05 | 3 | ZNF334    | 1.10E-03 | 6 |
| FGFR3    | 5.21E-03 | 3 | TMEM116   | 3.17E-03 | 6 |
| LLGL2    | 2.00E-03 | 3 | CCDC87    | 2.44E-05 | 6 |
| ETNK1    | 6.80E-04 | 3 | PRKAR2B   | 3.64E-03 | 6 |
| U50537   | 2.82E-03 | 3 | IFIT5     | 3.87E-04 | 6 |
| TP53I11  | 5.92E-03 | 3 | KLHDC7B   | 4.78E-04 | 6 |
| TJP3     | 3.88E-04 | 3 | SYT12     | 7.37E-04 | 6 |
| SLC39A2  | 1.43E-04 | 3 | KIAA0286  | 2.11E-04 | 6 |
| BDH1     | 2.11E-03 | 3 | UBE2C     | 3.07E-05 | 6 |
| TNNI3    | 1.67E-04 | 3 | PSMB8     | 1.19E-05 | 6 |
| MRPS25   | 3.01E-03 | 3 | FLJ20152  | 4.46E-03 | 6 |
| STARD4   | 1.94E-06 | 3 | CENPM     | 1.49E-03 | 6 |
| EPB41L5  | 8.22E-04 | 3 | NT5C3     | 5.61E-03 | 6 |
| WDR4     | 3.77E-03 | 3 | H2AFX     | 6.06E-04 | 6 |
| CACNA2D2 | 5.77E-06 | 3 | FBLN1     | 2.25E-03 | 6 |
| ATPBD4   | 8.13E-04 | 3 | NUSAP1    | 6.97E-04 | 5 |
| PLXNB1   | 9.44E-04 | 3 | NFKBIA    | 5.96E-03 | 5 |
| MKRN2    | 5.84E-06 | 3 | VCX       | 3.94E-03 | 5 |
| MYH10    | 8.88E-04 | 3 | KIAA1324L | 7.43E-04 | 5 |
| TMTC4    | 7.76E-04 | 3 | C1QTNF6   | 5.91E-03 | 5 |
| SACS     | 2.62E-04 | 3 | SGK       | 6.34E-03 | 5 |
| CDH13    | 1.59E-03 | 3 | CHMP4C    | 3.25E-03 | 5 |
| KCNK6    | 6.31E-04 | 3 | KIAA1009  | 2.53E-03 | 5 |
| TMPIT    | 4.99E-03 | 3 | SALL4     | 5.81E-03 | 5 |
| EFHA2    | 1.36E-04 | 3 | EPSTI1    | 2.66E-03 | 5 |
| GDAP1    | 1.11E-04 | 3 | CG018     | 1.21E-03 | 5 |
| TTLL7    | 3.11E-05 | 3 | K03200    | 4.96E-05 | 5 |
| GADD45A  | 2.01E-03 | 3 | NRL       | 7.84E-04 | 5 |
| CD24     | 4.13E-04 | 3 | BIRC5     | 4.27E-03 | 5 |
| RHOBTB2  | 2.68E-05 | 3 | HIAT1     | 2.03E-03 | 5 |
| NUDT2    | 5.09E-03 | 3 | HIST1H1B  | 5.83E-03 | 5 |
| CCL27    | 1.95E-04 | 3 | FLJ31033  | 1.21E-03 | 5 |
| FBXO3    | 1.88E-04 | 3 | TMEM16A   | 2.32E-03 | 5 |
| FIS1     | 3.18E-03 | 3 | ASS       | 1.56E-05 | 5 |
| DIXDC1   | 3.61E-03 | 3 | CCDC68    | 6.71E-06 | 5 |
| ASAH1    | 4.21E-03 | 3 | STC2      | 4.07E-04 | 5 |
| PER1     | 4.56E-03 | 3 | ZNF644    | 3.99E-03 | 5 |

|          |          |   |           |          |   |
|----------|----------|---|-----------|----------|---|
| CAPN12   | 2.75E-03 | 3 | PLXND1    | 1.19E-04 | 5 |
| NAV1     | 6.05E-05 | 3 | CLU       | 2.26E-03 | 5 |
| ATG9B    | 1.22E-03 | 3 | BRRN1     | 1.23E-03 | 5 |
| SERHL    | 3.54E-03 | 3 | TNNT3     | 4.05E-05 | 5 |
| ZFYVE21  | 3.56E-04 | 3 | MCM4      | 1.29E-03 | 5 |
| FLJ35024 | 9.10E-04 | 3 | LIFR      | 5.80E-05 | 5 |
| TUBB2A   | 1.40E-04 | 3 | TK1       | 1.82E-03 | 5 |
| PRRT3    | 1.15E-03 | 3 | SAA4      | 1.93E-03 | 5 |
| MAL2     | 3.06E-03 | 3 | LAMA4     | 4.05E-03 | 5 |
| DECR1    | 4.29E-05 | 3 | PTPRJ     | 3.11E-03 | 5 |
| FLJ20273 | 3.37E-03 | 3 | ARHGAP11A | 1.93E-05 | 5 |
| PFN4     | 6.30E-03 | 3 | MRPL48    | 4.22E-03 | 5 |
| TRIM4    | 4.37E-04 | 3 | EBF3      | 4.53E-03 | 5 |
| ERCC6    | 4.12E-03 | 3 | E2F7      | 1.61E-03 | 5 |
| SLC35F5  | 1.61E-03 | 3 | FAM83D    | 1.80E-04 | 5 |
| CYBRD1   | 9.47E-05 | 3 | RECQL4    | 1.01E-03 | 5 |
| ZNF589   | 9.26E-05 | 3 | ATOH8     | 9.86E-04 | 5 |
| TBC1D14  | 1.95E-03 | 3 | NFKBIE    | 3.67E-03 | 5 |
| CLNS1A   | 2.98E-03 | 3 | NLC1-B    | 4.27E-03 | 5 |
| TCEAL5   | 5.75E-03 | 3 | PSMA5     | 2.77E-03 | 5 |
| PDLIM2   | 2.33E-03 | 3 | PPAP2B    | 4.41E-03 | 5 |
| NOL6     | 1.77E-04 | 3 | JUNB      | 2.55E-04 | 5 |
| OR7E24   | 5.88E-03 | 3 | NFIL3     | 2.56E-03 | 5 |
| PIGF     | 2.48E-03 | 3 | NINJ1     | 4.78E-03 | 5 |
| MTHFD2L  | 4.52E-03 | 3 | SYNJ2     | 2.50E-03 | 5 |
| ULBP2    | 1.18E-03 | 3 | DHRS3     | 4.01E-04 | 5 |
| CCDC109B | 6.04E-03 | 3 | FAM107B   | 5.63E-04 | 5 |
| TCF7L1   | 1.16E-03 | 3 | RAPGEF5   | 1.60E-04 | 5 |
| GTF2E2   | 1.80E-03 | 3 | TCF19     | 5.31E-03 | 5 |
| FLJ20186 | 1.90E-05 | 3 | RBMXL1    | 2.01E-03 | 5 |
| NDUFA3   | 1.03E-03 | 3 | B2M       | 1.67E-03 | 5 |
| ADA      | 1.99E-03 | 3 | CCDC102A  | 3.66E-04 | 5 |
| MYO5A    | 3.00E-03 | 3 | TRMT5     | 5.25E-04 | 5 |
| LAMA2    | 1.33E-03 | 3 | FTHL12    | 5.07E-03 | 5 |
| NKX6-2   | 3.17E-05 | 3 | HSH2D     | 1.28E-03 | 5 |
| EVL      | 1.06E-03 | 3 | IFI16     | 7.11E-05 | 5 |
| DOCK7    | 5.94E-03 | 3 | UCK1      | 5.54E-03 | 5 |
| APEH     | 1.10E-03 | 3 | DTL       | 1.54E-03 | 5 |
| CAPG     | 2.35E-03 | 3 | MNS1      | 1.68E-04 | 5 |
| POLR2L   | 4.90E-03 | 3 | MRPL42P5  | 3.30E-04 | 5 |
| GCSH     | 1.50E-04 | 3 | HORMAD1   | 5.89E-03 | 5 |
| GRHPR    | 1.52E-03 | 3 | KCTD11    | 1.28E-04 | 5 |
| DLK1     | 5.60E-03 | 3 | C1RL      | 4.17E-04 | 5 |



|                 |          |   |          |          |   |
|-----------------|----------|---|----------|----------|---|
| <b>B3GNT8</b>   | 5.67E-06 | 3 | FLJ10357 | 2.18E-05 | 5 |
| <b>FAM63A</b>   | 3.65E-03 | 3 | MYOM2    | 9.13E-04 | 5 |
| <b>FGF1</b>     | 1.62E-03 | 3 | FLJ11259 | 5.16E-03 | 5 |
| <b>ACRV1</b>    | 4.72E-03 | 3 | CEP152   | 1.19E-03 | 5 |
| <b>GPR111</b>   | 3.26E-03 | 3 | UST      | 1.35E-03 | 5 |
| <b>TIMP2</b>    | 1.61E-03 | 3 | EIF2AK2  | 1.61E-03 | 5 |
| <b>SESTD1</b>   | 1.30E-03 | 3 | RXRA     | 3.01E-03 | 5 |
| <b>AK3L1</b>    | 8.75E-04 | 3 | CDKN3    | 1.28E-04 | 5 |
| <b>GUK1</b>     | 4.61E-04 | 3 | KBTBD11  | 2.92E-03 | 5 |
| <b>GM2A</b>     | 5.74E-03 | 3 | PARP14   | 1.42E-03 | 5 |
| <b>GPR125</b>   | 4.33E-05 | 3 | BMX      | 3.85E-04 | 5 |
| <b>APH1B</b>    | 1.21E-04 | 3 | NT5C2    | 7.72E-07 | 4 |
| <b>MAFB</b>     | 9.58E-04 | 3 | LYN      | 3.69E-03 | 4 |
| <b>FAM62B</b>   | 2.30E-05 | 3 | SLCO4A1  | 1.85E-06 | 4 |
| <b>FOXE1</b>    | 1.93E-03 | 3 | CKAP2L   | 4.02E-03 | 4 |
| <b>NIBP</b>     | 1.55E-03 | 3 | HNRPAB   | 4.40E-03 | 4 |
| <b>USP2</b>     | 3.89E-05 | 3 | FAM26A   | 2.76E-04 | 4 |
| <b>SOCS2</b>    | 2.51E-05 | 3 | GDF15    | 1.14E-04 | 4 |
| <b>EME2</b>     | 2.73E-04 | 3 | ASGR1    | 6.33E-03 | 4 |
| <b>EEF2</b>     | 5.37E-03 | 3 | FEN1     | 1.96E-03 | 4 |
| <b>ZAK</b>      | 2.68E-04 | 3 | ZBTB43   | 3.11E-03 | 4 |
| <b>RGS20</b>    | 1.24E-04 | 3 | ALG10B   | 1.61E-04 | 4 |
| <b>COG5</b>     | 1.75E-03 | 3 | ZNF559   | 5.24E-03 | 4 |
| <b>RUTBC3</b>   | 5.60E-03 | 3 | GCLM     | 5.04E-05 | 4 |
| <b>FAM98A</b>   | 2.54E-04 | 3 | ADAM23   | 6.13E-03 | 4 |
| <b>COTL1</b>    | 4.89E-04 | 3 | SLC41A2  | 1.02E-03 | 4 |
| <b>MAN2A1</b>   | 4.06E-03 | 3 | SPIN     | 4.18E-04 | 4 |
| <b>HYAL3</b>    | 4.30E-04 | 3 | AMIGO2   | 2.44E-05 | 4 |
| <b>PTPN18</b>   | 8.41E-04 | 3 | KRR1     | 5.49E-03 | 4 |
| <b>FLJ36748</b> | 6.12E-04 | 3 | CTDSP2   | 3.05E-03 | 4 |
| <b>GNA15</b>    | 5.09E-04 | 3 | ZNF484   | 4.28E-03 | 4 |
| <b>Z25424</b>   | 3.37E-04 | 3 | TMPO     | 1.79E-03 | 4 |
| <b>ARPC5</b>    | 1.30E-04 | 3 | APITD1   | 5.62E-03 | 4 |
| <b>RBMS2</b>    | 2.39E-04 | 3 | PMAIP1   | 4.40E-04 | 4 |
| <b>CDC34</b>    | 1.29E-03 | 3 | hCAP-D3  | 6.08E-03 | 4 |
| <b>DUSP7</b>    | 1.67E-03 | 3 | GTSE1    | 6.23E-03 | 4 |
| <b>GALNT11</b>  | 2.85E-05 | 3 | BBS5     | 4.39E-03 | 4 |
| <b>MTMR1</b>    | 5.14E-03 | 3 | LMO4     | 4.16E-05 | 4 |
| <b>GJB6</b>     | 4.74E-03 | 3 | MPHOSPH1 | 2.50E-03 | 4 |
| <b>VPS36</b>    | 4.36E-03 | 3 | CCNB1    | 6.28E-03 | 4 |
| <b>NOLA2</b>    | 8.08E-04 | 3 | RAB32    | 5.38E-04 | 4 |
| <b>MGC5370</b>  | 4.13E-03 | 3 | SNIP1    | 5.55E-03 | 4 |
| <b>SH3GLB1</b>  | 2.30E-03 | 2 | CBX5     | 1.36E-03 | 4 |

|                 |          |   |          |          |   |
|-----------------|----------|---|----------|----------|---|
| <b>KLF6</b>     | 4.20E-04 | 2 | CACYBP   | 7.06E-05 | 4 |
| <b>ACAT2</b>    | 1.07E-04 | 2 | APOLD1   | 5.26E-03 | 4 |
| <b>FBXL16</b>   | 4.93E-03 | 2 | UBE2T    | 4.00E-03 | 4 |
| <b>EDEM3</b>    | 6.18E-03 | 2 | EDNRB    | 7.56E-04 | 4 |
| <b>RPS27L</b>   | 2.60E-03 | 2 | DENND3   | 4.61E-03 | 4 |
| <b>GSTO2</b>    | 1.11E-03 | 2 | CXCL2    | 2.99E-04 | 4 |
| <b>MULK</b>     | 3.66E-03 | 2 | ZNF623   | 1.73E-05 | 4 |
| <b>H12329</b>   | 1.11E-06 | 2 | SLC12A7  | 2.14E-03 | 4 |
| <b>VDP</b>      | 1.91E-04 | 2 | BIRC2    | 2.57E-03 | 4 |
| <b>MTMR9</b>    | 1.35E-03 | 2 | CENPA    | 8.00E-05 | 4 |
| <b>NEIL2</b>    | 1.47E-04 | 2 | LY75     | 2.71E-06 | 4 |
| <b>CXX1</b>     | 5.32E-03 | 2 | CAPS2    | 4.54E-03 | 4 |
| <b>KLHL18</b>   | 1.54E-04 | 2 | SHCBP1   | 2.93E-04 | 4 |
| <b>RRAS</b>     | 6.38E-03 | 2 | SLC30A7  | 2.88E-04 | 4 |
| <b>ENTPD6</b>   | 2.92E-03 | 2 | MSX2P    | 4.69E-04 | 4 |
| <b>RAGE</b>     | 6.08E-03 | 2 | SOX4     | 1.58E-03 | 4 |
| <b>CDC20B</b>   | 2.78E-03 | 2 | TMIE     | 1.34E-03 | 4 |
| <b>CIB2</b>     | 5.37E-03 | 2 | PSME1    | 9.19E-05 | 4 |
| <b>STIM1</b>    | 4.08E-03 | 2 | HPS3     | 1.39E-03 | 4 |
| <b>HPCA</b>     | 2.58E-03 | 2 | CCR7     | 4.14E-03 | 4 |
| <b>SLC2A9</b>   | 4.75E-03 | 2 | SAA2     | 5.01E-04 | 4 |
| <b>OPRS1</b>    | 7.62E-04 | 2 | KIF23    | 1.58E-04 | 4 |
| <b>ELOVL1</b>   | 3.03E-03 | 2 | CD47     | 1.79E-03 | 4 |
| <b>MSRB3</b>    | 2.96E-04 | 2 | TOPBP1   | 2.30E-05 | 4 |
| <b>LYSMD1</b>   | 1.67E-04 | 2 | HIST1H1D | 3.93E-04 | 4 |
| <b>SLC30A9</b>  | 6.07E-05 | 2 | MT1F     | 3.31E-03 | 4 |
| <b>S100A10</b>  | 2.52E-03 | 2 | ESPL1    | 2.58E-03 | 4 |
| <b>CDCP1</b>    | 3.49E-03 | 2 | HIRIP3   | 1.60E-06 | 4 |
| <b>ATP7B</b>    | 1.40E-03 | 2 | GALNT12  | 2.65E-03 | 4 |
| <b>SLC37A2</b>  | 5.55E-03 | 2 | NAT11    | 1.09E-04 | 4 |
| <b>ACO1</b>     | 1.22E-03 | 2 | ASPM     | 4.11E-04 | 4 |
| <b>FAM86B1</b>  | 3.40E-03 | 2 | SURF1    | 2.79E-03 | 4 |
| <b>RHOA</b>     | 3.45E-03 | 2 | MAST1    | 2.32E-03 | 4 |
| <b>CIRBP</b>    | 3.03E-03 | 2 | KIAA1344 | 5.19E-03 | 4 |
| <b>PGCP</b>     | 1.77E-03 | 2 | CP110    | 4.76E-03 | 4 |
| <b>ATOX1</b>    | 7.73E-04 | 2 | SP110    | 3.64E-04 | 4 |
| <b>AMPD3</b>    | 1.15E-03 | 2 | ZWINT    | 8.29E-04 | 4 |
| <b>UBXD1</b>    | 1.11E-03 | 2 | DNTTIP2  | 4.56E-03 | 4 |
| <b>AP3S1</b>    | 1.51E-03 | 2 | RBL1     | 1.17E-03 | 4 |
| <b>WNK1</b>     | 3.47E-03 | 2 | PIGA     | 2.17E-03 | 4 |
| <b>GSTA4</b>    | 7.34E-04 | 2 | SEN5     | 6.06E-03 | 4 |
| <b>RASSF1</b>   | 3.36E-03 | 2 | POFUT1   | 4.88E-03 | 4 |
| <b>KIAA1737</b> | 1.51E-06 | 2 | HOXD9    | 1.70E-04 | 4 |

|           |          |   |          |          |   |
|-----------|----------|---|----------|----------|---|
| TSGA2     | 3.23E-03 | 2 | PHF14    | 1.99E-03 | 4 |
| PKD2      | 1.15E-03 | 2 | RAB17    | 2.73E-04 | 4 |
| ARHGAP8   | 9.23E-04 | 2 | CCNF     | 2.26E-03 | 4 |
| TSPO      | 3.27E-03 | 2 | POPDC3   | 3.42E-03 | 4 |
| TNFSF12   | 5.87E-04 | 2 | COL8A2   | 3.48E-03 | 4 |
| GJB5      | 1.76E-05 | 2 | HLA-G    | 8.05E-05 | 4 |
| SMAD2     | 1.67E-03 | 2 | WDR8     | 3.27E-03 | 4 |
| LRRC32    | 5.75E-03 | 2 | QTRT1    | 8.37E-05 | 4 |
| SIN3B     | 1.44E-04 | 2 | ADRB2    | 1.43E-03 | 4 |
| ARNTL2    | 9.74E-05 | 2 | TOR1B    | 2.35E-03 | 4 |
| NTN1      | 5.13E-03 | 2 | GPRC5C   | 7.81E-04 | 4 |
| FLJ37228  | 1.79E-03 | 2 | IFI27    | 5.65E-06 | 4 |
| RUFY3     | 4.74E-03 | 2 | BLVRB    | 3.64E-03 | 4 |
| TRAPPC5   | 6.36E-03 | 2 | WNK2     | 4.31E-03 | 4 |
| TMSB10    | 8.19E-04 | 2 | GBA      | 6.96E-05 | 4 |
| P53AIP1   | 3.70E-03 | 2 | PSMB2    | 1.62E-03 | 4 |
| F12       | 1.05E-03 | 2 | HELLS    | 1.94E-03 | 4 |
| ZNFN1A3   | 5.80E-03 | 2 | HLA-C    | 5.60E-05 | 4 |
| SMARCD2   | 4.22E-03 | 2 | PSMB10   | 1.93E-03 | 4 |
| LETM2     | 2.38E-04 | 2 | ITGA1    | 3.07E-03 | 4 |
| SPRED2    | 1.03E-07 | 2 | ALG10    | 3.17E-04 | 4 |
| SEMA4G    | 6.72E-04 | 2 | TRAM2    | 6.08E-03 | 4 |
| D2HGDH    | 6.21E-05 | 2 | CHST3    | 2.33E-03 | 4 |
| GOLGA2LY1 | 2.77E-03 | 2 | DNAJB11  | 2.66E-04 | 4 |
| EXOC4     | 2.09E-04 | 2 | EFEMP1   | 4.12E-03 | 4 |
| SALL2     | 6.99E-04 | 2 | DOLPP1   | 3.11E-03 | 4 |
| GIPC2     | 1.32E-03 | 2 | CDCA8    | 1.08E-08 | 4 |
| EIF1AY    | 3.68E-05 | 2 | KIAA0649 | 1.75E-04 | 4 |
| KIAA1609  | 1.66E-03 | 2 | DAPK2    | 1.47E-03 | 4 |
| CTSK      | 1.58E-03 | 2 | CXCL1    | 3.81E-03 | 4 |
| CCNG2     | 4.04E-05 | 2 | NUAK1    | 2.72E-03 | 4 |
| TMCO3     | 2.80E-03 | 2 | ADAM12   | 2.98E-04 | 4 |
| HSPB1     | 6.95E-04 | 2 | BRD3     | 4.71E-03 | 4 |
| ISG20L1   | 3.93E-03 | 2 | COQ10A   | 6.12E-03 | 4 |
| GALK1     | 3.98E-03 | 2 | CENPE    | 1.75E-04 | 4 |
| TNFAIP1   | 2.46E-03 | 2 | PRDM1    | 4.49E-03 | 4 |
| ME1       | 7.13E-05 | 2 | HIST1H4L | 1.99E-06 | 4 |
| A1BG      | 6.22E-03 | 2 | MSX2     | 3.80E-03 | 4 |
| FBXO22    | 5.32E-03 | 2 | DCLRE1B  | 9.45E-04 | 4 |
| RAB5C     | 5.20E-03 | 2 | OVOL1    | 5.58E-05 | 4 |
| SRA1      | 4.71E-04 | 2 | CCNB2    | 5.47E-03 | 4 |
| CASD1     | 1.89E-03 | 2 | GTF2B    | 9.09E-05 | 4 |
| DNASE1L1  | 2.93E-06 | 2 | DCLRE1C  | 3.09E-04 | 4 |

|                  |          |   |          |          |   |
|------------------|----------|---|----------|----------|---|
| <b>TNFRSF10B</b> | 1.31E-04 | 2 | ABCA1    | 5.60E-03 | 4 |
| <b>S100A11</b>   | 6.25E-03 | 2 | ECT2     | 2.56E-03 | 4 |
| <b>LYPLA1</b>    | 5.44E-03 | 2 | ZNF653   | 5.32E-03 | 4 |
| <b>NOTCH2NL</b>  | 3.32E-03 | 2 | IFI30    | 5.71E-03 | 4 |
| <b>PLAC2</b>     | 8.90E-04 | 2 | MAP3K2   | 1.06E-03 | 4 |
| <b>RPL10L</b>    | 4.46E-03 | 2 | ADAR     | 4.99E-03 | 4 |
| <b>FZD1</b>      | 1.67E-03 | 2 | INPP1    | 1.17E-03 | 4 |
| <b>POLD4</b>     | 4.58E-03 | 2 | TMEM118  | 1.69E-06 | 4 |
| <b>POLR1E</b>    | 1.03E-04 | 2 | CITED2   | 5.28E-03 | 4 |
| <b>LAYN</b>      | 3.23E-04 | 2 | CASP1    | 3.89E-03 | 4 |
| <b>MGAT4A</b>    | 5.38E-03 | 2 | PDCL     | 1.48E-03 | 4 |
| <b>KIAA1430</b>  | 4.18E-03 | 2 | OLFM1    | 5.45E-04 | 4 |
| <b>RABGGTB</b>   | 1.07E-03 | 2 | ZNF281   | 1.66E-04 | 4 |
| <b>MGLL</b>      | 2.07E-03 | 2 | CNNM2    | 3.35E-03 | 4 |
| <b>SH2D3A</b>    | 5.26E-03 | 2 | SGOL2    | 4.92E-05 | 4 |
| <b>POLH</b>      | 2.30E-03 | 2 | PAQR9    | 8.47E-04 | 4 |
| <b>PMS2L2</b>    | 4.53E-03 | 2 | ITPKA    | 6.09E-03 | 4 |
| <b>GBA2</b>      | 2.95E-04 | 2 | NFKB1    | 1.22E-03 | 4 |
| <b>CENTD1</b>    | 7.94E-05 | 2 | FLJ32312 | 5.69E-03 | 3 |
| <b>PPIC</b>      | 2.29E-03 | 2 | PRPF19   | 3.12E-03 | 3 |
| <b>CD1A</b>      | 3.01E-03 | 2 | FLJ11286 | 5.04E-05 | 3 |
| <b>TKT</b>       | 1.82E-03 | 2 | DDX39    | 2.87E-03 | 3 |
| <b>CINP</b>      | 6.38E-03 | 2 | HMG2     | 1.06E-03 | 3 |
| <b>PIGN</b>      | 5.71E-03 | 2 | FAM40A   | 1.99E-03 | 3 |
| <b>PQLC3</b>     | 1.23E-03 | 2 | HBE1     | 3.81E-03 | 3 |
| <b>SPIN-2</b>    | 1.02E-03 | 2 | TUBD1    | 1.62E-03 | 3 |
| <b>TEKT4</b>     | 5.65E-06 | 2 | TROAP    | 6.14E-04 | 3 |
| <b>SCFD2</b>     | 1.18E-03 | 2 | MB       | 3.93E-03 | 3 |
| <b>TAS2R3</b>    | 1.47E-03 | 2 | KNTC1    | 1.75E-04 | 3 |
| <b>SMYD2</b>     | 3.75E-03 | 2 | RNF152   | 1.32E-03 | 3 |
| <b>EPHA1</b>     | 1.74E-03 | 2 | WHSC1L1  | 2.02E-05 | 3 |
| <b>SMAP1</b>     | 1.29E-03 | 2 | ZNF266   | 4.77E-04 | 3 |
| <b>ATP6V1B2</b>  | 1.77E-03 | 2 | MGC3032  | 2.50E-03 | 3 |
| <b>ENC1</b>      | 2.65E-04 | 2 | APOL2    | 5.14E-06 | 3 |
| <b>STUB1</b>     | 4.19E-07 | 2 | POU5F1   | 4.35E-03 | 3 |
| <b>SNCG</b>      | 1.04E-04 | 2 | ANP32B   | 2.56E-03 | 3 |
| <b>SPCS1</b>     | 2.50E-03 | 2 | SRCRB4D  | 1.67E-04 | 3 |
| <b>MYO6</b>      | 2.42E-03 | 2 | BUB1     | 7.19E-05 | 3 |
| <b>ZYG11B</b>    | 2.53E-03 | 2 | HBEGF    | 9.07E-09 | 3 |
| <b>JMJD2C</b>    | 1.05E-03 | 2 | HIST1H4J | 3.86E-03 | 3 |
| <b>ZP3</b>       | 1.93E-04 | 2 | SQSTM1   | 5.14E-03 | 3 |
| <b>EFNB3</b>     | 5.43E-03 | 2 | KIF22    | 4.87E-03 | 3 |
| <b>SRI</b>       | 3.93E-03 | 2 | KBTBD2   | 2.18E-03 | 3 |

|                 |          |   |          |          |   |
|-----------------|----------|---|----------|----------|---|
| <b>SNX24</b>    | 1.02E-03 | 2 | ZNF528   | 1.14E-03 | 3 |
| <b>PMS2L3</b>   | 3.11E-04 | 2 | ZBTB25   | 6.31E-03 | 3 |
| <b>RECK</b>     | 3.73E-03 | 2 | GIYD1    | 3.02E-03 | 3 |
| <b>SQLE</b>     | 1.71E-04 | 2 | DIP2C    | 2.09E-03 | 3 |
| <b>HMGCR</b>    | 2.62E-03 | 2 | RRM2     | 2.25E-03 | 3 |
| <b>TEPP</b>     | 1.22E-04 | 2 | ARHGAP21 | 3.68E-05 | 3 |
| <b>KIAA1804</b> | 2.28E-04 | 2 | KIAA0280 | 9.05E-06 | 3 |
| <b>HARS2</b>    | 2.14E-03 | 2 | HIST1H4E | 5.97E-03 | 3 |
| <b>CCDC120</b>  | 6.07E-04 | 2 | AADAC    | 1.43E-03 | 3 |
| <b>PRSS8</b>    | 1.00E-03 | 2 | NUPR1    | 7.82E-05 | 3 |
| <b>STX12</b>    | 1.91E-03 | 2 | PRRT2    | 2.67E-03 | 3 |
| <b>CD40</b>     | 1.32E-06 | 2 | CDC45L   | 5.63E-03 | 3 |
|                 |          |   | CEP55    | 5.75E-03 | 3 |
|                 |          |   | HIST1H3I | 2.11E-06 | 3 |
|                 |          |   | RHBDL3   | 3.46E-04 | 3 |
|                 |          |   | FZD7     | 7.97E-04 | 3 |
|                 |          |   | CRSP8    | 6.40E-04 | 3 |
|                 |          |   | LANCL2   | 4.11E-03 | 3 |
|                 |          |   | PLEKHK1  | 9.75E-05 | 3 |
|                 |          |   | FCMD     | 5.60E-05 | 3 |
|                 |          |   | FIGNL1   | 3.26E-03 | 3 |
|                 |          |   | LPTM4B   | 2.45E-04 | 3 |
|                 |          |   | HIST1H4F | 1.54E-03 | 3 |
|                 |          |   | IER2     | 4.93E-05 | 3 |
|                 |          |   | NFIX     | 1.35E-05 | 3 |
|                 |          |   | ZSCAN5   | 2.70E-04 | 3 |
|                 |          |   | PSME2    | 3.56E-05 | 3 |
|                 |          |   | LMX1B    | 1.65E-04 | 3 |
|                 |          |   | CNAP1    | 1.60E-03 | 3 |
|                 |          |   | CABP1    | 3.82E-03 | 3 |
|                 |          |   | FLJ14397 | 4.15E-03 | 3 |
|                 |          |   | KIAA1450 | 1.50E-04 | 3 |
|                 |          |   | MAZ      | 6.28E-03 | 3 |
|                 |          |   | ZSWIM1   | 2.71E-03 | 3 |
|                 |          |   | CCDC74B  | 6.41E-04 | 3 |
|                 |          |   | QKI      | 3.52E-04 | 3 |
|                 |          |   | PHF19    | 1.92E-05 | 3 |
|                 |          |   | CASC5    | 5.78E-03 | 3 |
|                 |          |   | TRIM5    | 1.44E-03 | 3 |
|                 |          |   | GINS1    | 7.48E-06 | 3 |
|                 |          |   | GCA      | 3.59E-04 | 3 |
|                 |          |   | SPIRE1   | 2.32E-03 | 3 |
|                 |          |   | WDR34    | 2.25E-03 | 3 |

|  |          |          |   |
|--|----------|----------|---|
|  | DNTTIP1  | 1.87E-05 | 3 |
|  | IQCC     | 1.48E-04 | 3 |
|  | EPB41L1  | 1.42E-04 | 3 |
|  | TMED1    | 2.93E-03 | 3 |
|  | PHF2     | 1.14E-03 | 3 |
|  | NPNT     | 4.10E-03 | 3 |
|  | MDC1     | 7.87E-04 | 3 |
|  | ZFAND2A  | 4.03E-04 | 3 |
|  | IL27RA   | 4.00E-03 | 3 |
|  | TMED5    | 5.22E-03 | 3 |
|  | RNF36    | 8.77E-06 | 3 |
|  | SLC31A1  | 3.53E-03 | 3 |
|  | MPHOSPH9 | 7.15E-07 | 3 |
|  | TMEM37   | 7.21E-05 | 3 |
|  | PDGFA    | 1.78E-03 | 3 |
|  | KIAA1571 | 2.17E-04 | 3 |
|  | ZNF248   | 3.26E-03 | 3 |
|  | TRAF2    | 2.14E-03 | 3 |
|  | RFP      | 3.31E-03 | 3 |
|  | IQCK     | 5.06E-03 | 3 |
|  | RAD54L   | 1.62E-03 | 3 |
|  | FTH1     | 7.55E-04 | 3 |
|  | KIF26A   | 2.13E-03 | 3 |
|  | GPR172B  | 3.66E-04 | 3 |
|  | NLC1-C   | 4.83E-03 | 3 |
|  | HNRPA0   | 4.41E-03 | 3 |
|  | SOAT1    | 6.37E-04 | 3 |
|  | RPA2     | 5.32E-03 | 3 |
|  | GTF3C5   | 4.58E-03 | 3 |
|  | DAND5    | 1.75E-04 | 3 |
|  | ROD1     | 3.09E-04 | 3 |
|  | PPM2C    | 1.42E-03 | 3 |
|  | XKR3     | 5.12E-04 | 3 |
|  | DCC1     | 3.15E-03 | 3 |
|  | ARRDC2   | 1.78E-04 | 3 |
|  | BRF2     | 5.42E-03 | 3 |
|  | FLJ39582 | 1.70E-03 | 3 |
|  | CD302    | 7.98E-04 | 3 |
|  | PARD6B   | 3.03E-03 | 3 |
|  | APOL4    | 4.60E-04 | 3 |
|  | INTS7    | 9.63E-04 | 3 |
|  | ZNF227   | 3.59E-03 | 3 |
|  | ZBED1    | 4.98E-04 | 3 |

|  |           |          |   |
|--|-----------|----------|---|
|  | KIF15     | 2.88E-04 | 3 |
|  | ZNF175    | 2.57E-03 | 3 |
|  | SLC9A8    | 3.32E-04 | 3 |
|  | DOC2A     | 5.88E-03 | 3 |
|  | PPP6C     | 5.86E-03 | 3 |
|  | ZCD2      | 2.21E-03 | 3 |
|  | NPAT      | 4.41E-06 | 3 |
|  | PRC1      | 2.36E-03 | 3 |
|  | HIST1H4B  | 5.07E-03 | 3 |
|  | GOLPH2    | 3.99E-03 | 3 |
|  | INHBA     | 5.58E-03 | 3 |
|  | POLA      | 1.46E-03 | 3 |
|  | TDRD7     | 2.00E-03 | 3 |
|  | CDT1      | 1.08E-05 | 3 |
|  | HIST1H4D  | 5.52E-04 | 3 |
|  | NFKBIL1   | 6.03E-03 | 3 |
|  | TRPV1     | 2.72E-05 | 3 |
|  | POLA2     | 5.35E-04 | 3 |
|  | ABCD3     | 3.01E-03 | 3 |
|  | KCNMB3    | 1.51E-03 | 3 |
|  | SFPQ      | 4.15E-03 | 3 |
|  | SMPD1     | 5.46E-03 | 3 |
|  | MATK      | 8.43E-04 | 3 |
|  | KIF27     | 2.69E-06 | 3 |
|  | KIF7      | 9.51E-04 | 3 |
|  | TRIP13    | 1.01E-03 | 3 |
|  | HKR3      | 4.87E-03 | 3 |
|  | PRMT6     | 3.40E-03 | 3 |
|  | HYLS1     | 8.33E-04 | 3 |
|  | MMP23B    | 5.72E-03 | 3 |
|  | AMPD2     | 1.00E-03 | 3 |
|  | GMNN      | 4.24E-03 | 3 |
|  | HIST1H2BD | 1.38E-06 | 3 |
|  | ZNF189    | 6.10E-05 | 3 |
|  | IER3      | 3.68E-04 | 3 |
|  | LOXL4     | 3.66E-03 | 3 |
|  | ACTL6A    | 5.54E-03 | 3 |
|  | CYP2B6    | 2.22E-03 | 3 |
|  | GALNS     | 4.74E-03 | 3 |
|  | PHF21B    | 3.51E-03 | 3 |
|  | TRIM22    | 5.03E-03 | 3 |
|  | BARD1     | 8.75E-07 | 3 |
|  | CELSR3    | 1.72E-04 | 3 |

|  |          |          |   |
|--|----------|----------|---|
|  | TP53BP2  | 7.50E-05 | 3 |
|  | RASIP1   | 7.27E-05 | 3 |
|  | RAD51AP1 | 2.73E-03 | 3 |
|  | GLOXD1   | 1.47E-04 | 3 |
|  | ZNF469   | 2.40E-04 | 3 |
|  | EXT1     | 1.99E-03 | 3 |
|  | PDLIM1   | 3.05E-03 | 3 |
|  | HLA-DMB  | 1.04E-03 | 3 |
|  | POLE3    | 3.55E-05 | 3 |
|  | ZNF20    | 5.54E-04 | 3 |
|  | CRSP2    | 4.14E-03 | 3 |
|  | HLXB9    | 1.81E-04 | 3 |
|  | HIST1H3F | 1.84E-03 | 3 |
|  | GPR56    | 8.41E-05 | 3 |
|  | RNASEH2A | 2.98E-03 | 3 |
|  | UBXD5    | 3.14E-03 | 3 |
|  | SCIN     | 4.46E-03 | 3 |
|  | TMEM15   | 1.18E-03 | 3 |
|  | RGC32    | 2.88E-03 | 3 |
|  | NNT      | 2.40E-03 | 3 |
|  | ANKRD10  | 2.66E-04 | 3 |
|  | RND3     | 1.68E-04 | 3 |
|  | ZBTB6    | 2.59E-03 | 3 |
|  | PLAT     | 6.42E-03 | 3 |
|  | CHN1     | 2.84E-03 | 3 |
|  | RAB30    | 2.90E-04 | 3 |
|  | CREB3L4  | 4.30E-04 | 3 |
|  | BRD8     | 1.16E-04 | 3 |
|  | NDUFB9   | 6.34E-03 | 3 |
|  | DNAPTP6  | 6.28E-03 | 3 |
|  | ZNF76    | 1.49E-03 | 3 |
|  | FAM55C   | 5.28E-03 | 3 |
|  | ZNF232   | 3.31E-06 | 3 |
|  | CYB5B    | 9.80E-06 | 3 |
|  | HSPA1A   | 2.26E-04 | 3 |
|  | TBC1D15  | 6.75E-04 | 3 |
|  | TESK2    | 6.17E-11 | 3 |
|  | SEPX1    | 9.77E-05 | 3 |
|  | CEI      | 1.92E-04 | 3 |
|  | TMEPAI   | 3.06E-04 | 3 |
|  | LY6K     | 1.11E-03 | 3 |
|  | USP31    | 4.04E-03 | 3 |
|  | B3GALT4  | 4.39E-03 | 3 |



|  |          |          |   |
|--|----------|----------|---|
|  | TG       | 4.93E-03 | 3 |
|  | RAE1     | 4.30E-03 | 3 |
|  | PTTG2    | 2.35E-05 | 3 |
|  | DNA2L    | 4.21E-03 | 3 |
|  | KCNS3    | 3.23E-03 | 3 |
|  | LEFTY1   | 3.00E-04 | 3 |
|  | GTF3C4   | 9.04E-05 | 3 |
|  | UGCG     | 2.46E-03 | 3 |
|  | FCHSD2   | 2.81E-03 | 3 |
|  | FAM102A  | 5.62E-04 | 3 |
|  | MGC14327 | 1.28E-04 | 3 |
|  | GCDH     | 3.40E-03 | 3 |
|  | ZNF292   | 3.20E-08 | 3 |
|  | TMEM39A  | 2.41E-03 | 3 |
|  | HUS1B    | 3.69E-03 | 3 |
|  | ABTB2    | 2.29E-04 | 3 |
|  | HNRPA2B1 | 7.14E-04 | 3 |
|  | GINS2    | 1.31E-03 | 3 |
|  | E2F8     | 4.92E-04 | 3 |
|  | CBFA2T2  | 1.40E-03 | 3 |
|  | MAN1B1   | 5.33E-04 | 3 |
|  | FANCM    | 5.84E-03 | 3 |
|  | MAP3K13  | 4.20E-03 | 3 |
|  | SULT4A1  | 6.90E-04 | 3 |
|  | FLJ13744 | 2.10E-03 | 3 |
|  | EDN1     | 9.04E-05 | 3 |
|  | LDB2     | 1.80E-03 | 3 |
|  | WNT3     | 2.78E-03 | 3 |
|  | INCA     | 2.56E-03 | 3 |
|  | SSNA1    | 5.58E-06 | 3 |
|  | CCL20    | 3.19E-03 | 3 |
|  | PTTG3    | 3.08E-04 | 3 |
|  | RCC2     | 2.52E-06 | 3 |
|  | TBC1D13  | 3.44E-04 | 3 |
|  | ZCCHC3   | 4.56E-04 | 3 |
|  | FLJ45248 | 3.19E-04 | 3 |
|  | TMSB4X   | 1.18E-03 | 3 |
|  | DLX2     | 3.16E-03 | 3 |
|  | CRY1     | 2.87E-04 | 3 |
|  | SP2      | 6.79E-04 | 3 |
|  | MRPL47   | 2.82E-03 | 3 |
|  | RCC1     | 1.13E-04 | 3 |
|  | LHX6     | 2.57E-04 | 3 |

|  |           |          |   |
|--|-----------|----------|---|
|  | VAX2      | 3.09E-03 | 3 |
|  | CWF19L2   | 3.76E-03 | 3 |
|  | IL23A     | 5.71E-04 | 3 |
|  | IQCE      | 1.91E-03 | 3 |
|  | RIOK3     | 1.44E-04 | 3 |
|  | GBAP      | 7.73E-04 | 3 |
|  | CBR3      | 9.42E-04 | 3 |
|  | ZNF251    | 6.03E-03 | 3 |
|  | WDR53     | 2.70E-03 | 3 |
|  | NALP12    | 1.46E-03 | 3 |
|  | PNPT1     | 1.40E-03 | 3 |
|  | AHR       | 3.84E-03 | 3 |
|  | SNRPD1    | 3.79E-03 | 3 |
|  | KIAA1600  | 2.37E-04 | 3 |
|  | MED10     | 1.21E-03 | 3 |
|  | DZIP1     | 3.47E-04 | 3 |
|  | MGC11271  | 3.06E-03 | 3 |
|  | RASEF     | 1.37E-03 | 3 |
|  | SET       | 1.80E-04 | 3 |
|  | FAM13A1   | 1.01E-05 | 3 |
|  | RAB6A     | 1.46E-03 | 3 |
|  | PPGB      | 6.31E-03 | 3 |
|  | METTL1    | 8.13E-05 | 3 |
|  | LGP2      | 3.10E-04 | 3 |
|  | ITGAV     | 2.53E-03 | 3 |
|  | MOCOS     | 8.96E-05 | 3 |
|  | ZDHHC6    | 3.78E-04 | 3 |
|  | DERL2     | 9.70E-08 | 3 |
|  | KIAA1217  | 6.92E-05 | 2 |
|  | MGC12982  | 3.44E-03 | 2 |
|  | UBQLN1    | 1.75E-04 | 2 |
|  | NUP62CL   | 1.61E-03 | 2 |
|  | H2AFV     | 2.13E-03 | 2 |
|  | PSCD2L    | 4.45E-05 | 2 |
|  | RAD9A     | 1.23E-03 | 2 |
|  | GRIPAP1   | 1.54E-04 | 2 |
|  | HIST3H2BB | 1.27E-03 | 2 |
|  | HBLD2     | 1.57E-03 | 2 |
|  | TRIM32    | 2.58E-03 | 2 |
|  | PAIP2     | 3.20E-03 | 2 |
|  | KIAA1706  | 2.60E-04 | 2 |
|  | ASNA1     | 2.62E-03 | 2 |
|  | WDR71     | 1.09E-04 | 2 |

|  |            |          |   |
|--|------------|----------|---|
|  | KIAA0495   | 1.83E-03 | 2 |
|  | CAMK1D     | 5.84E-03 | 2 |
|  | CD164      | 8.40E-05 | 2 |
|  | UCN        | 3.49E-03 | 2 |
|  | CSTF2      | 8.34E-04 | 2 |
|  | PELI2      | 7.23E-05 | 2 |
|  | SNAI1      | 3.50E-04 | 2 |
|  | SLC2A5     | 1.47E-04 | 2 |
|  | BCL3       | 3.07E-03 | 2 |
|  | CD048206   | 8.74E-04 | 2 |
|  | RFK        | 4.40E-03 | 2 |
|  | D4ST1      | 3.36E-03 | 2 |
|  | SLC39A7    | 3.36E-03 | 2 |
|  | LSG1       | 6.00E-04 | 2 |
|  | PDZD8      | 1.92E-03 | 2 |
|  | HNRPH3     | 4.19E-03 | 2 |
|  | LGMN       | 2.95E-03 | 2 |
|  | NCOA3      | 4.87E-04 | 2 |
|  | TRPC4      | 3.67E-03 | 2 |
|  | PDE10A     | 6.14E-03 | 2 |
|  | TMEM22     | 3.46E-03 | 2 |
|  | GADD45GIP1 | 2.54E-05 | 2 |
|  | HIVEP2     | 3.47E-03 | 2 |
|  | PARP1      | 2.43E-04 | 2 |
|  | PHYH       | 6.00E-03 | 2 |
|  | RWDD2      | 8.63E-04 | 2 |
|  | CASP5      | 5.07E-04 | 2 |
|  | WAC        | 3.33E-03 | 2 |
|  | MINPP1     | 8.09E-04 | 2 |
|  | HCLS1      | 3.25E-03 | 2 |
|  | PSAT1      | 8.60E-05 | 2 |
|  | MRPL11     | 3.44E-04 | 2 |
|  | RABEPK     | 9.82E-04 | 2 |
|  | HIST1H2AD  | 2.16E-03 | 2 |
|  | STARD5     | 5.96E-03 | 2 |
|  | BTN2A2     | 1.02E-03 | 2 |
|  | RNF144     | 2.97E-03 | 2 |
|  | GNS        | 1.80E-03 | 2 |
|  | SEPHS2     | 3.38E-03 | 2 |
|  | PASD1      | 1.79E-03 | 2 |
|  | KLF10      | 4.59E-04 | 2 |
|  | ACADS      | 1.23E-04 | 2 |
|  | CLPB       | 1.83E-03 | 2 |

|  |          |          |   |
|--|----------|----------|---|
|  | APRIN    | 3.32E-07 | 2 |
|  | ZCCHC14  | 5.82E-03 | 2 |
|  | DDOST    | 2.94E-03 | 2 |
|  | ECOP     | 1.70E-03 | 2 |
|  | ZNF12    | 5.88E-04 | 2 |
|  | RIC8B    | 4.69E-06 | 2 |
|  | NSMCE2   | 4.89E-03 | 2 |
|  | DACT1    | 2.65E-03 | 2 |
|  | BVES     | 4.44E-04 | 2 |
|  | TMEM121  | 2.42E-03 | 2 |
|  | GATM     | 5.72E-03 | 2 |
|  | FAM50B   | 3.24E-04 | 2 |
|  | KLF11    | 4.04E-03 | 2 |
|  | CDK9     | 5.04E-10 | 2 |
|  | SORD     | 2.73E-05 | 2 |
|  | BACH1    | 4.33E-03 | 2 |
|  | PSMC2    | 6.21E-03 | 2 |
|  | TRAF1    | 1.28E-03 | 2 |
|  | MPO      | 6.22E-03 | 2 |
|  | TRAPPC6A | 2.79E-03 | 2 |
|  | DBT      | 1.19E-06 | 2 |
|  | HCFC1R1  | 2.34E-03 | 2 |
|  | ZFHX4    | 4.34E-03 | 2 |
|  | CCDC75   | 5.55E-03 | 2 |
|  | SHRM     | 1.96E-03 | 2 |
|  | TBPL1    | 1.30E-04 | 2 |
|  | JOSD1    | 1.12E-03 | 2 |
|  | RFWD2    | 5.53E-04 | 2 |
|  | FAM91A1  | 4.86E-03 | 2 |
|  | COL27A1  | 7.32E-04 | 2 |
|  | PFKFB4   | 2.66E-04 | 2 |
|  | RFC3     | 1.68E-03 | 2 |
|  | BCL2L11  | 4.84E-05 | 2 |
|  | FGFR1OP  | 2.27E-03 | 2 |
|  | CENPP    | 2.93E-03 | 2 |
|  | XKR4     | 4.19E-03 | 2 |
|  | COL4A2   | 3.65E-03 | 2 |
|  | EID-3    | 1.85E-05 | 2 |
|  | STARD13  | 3.41E-04 | 2 |
|  | CCPG1    | 5.10E-03 | 2 |
|  | RAD51    | 2.42E-03 | 2 |
|  | RBBP7    | 2.44E-05 | 2 |
|  | PPAPDC1B | 7.18E-04 | 2 |

|  |          |          |   |
|--|----------|----------|---|
|  | SURF2    | 3.99E-04 | 2 |
|  | FOXP4    | 3.17E-04 | 2 |
|  | NEU1     | 5.14E-03 | 2 |
|  | NOL8     | 4.14E-04 | 2 |
|  | SLC2A6   | 3.49E-05 | 2 |
|  | ODF2     | 2.48E-03 | 2 |
|  | SLC12A8  | 4.73E-03 | 2 |
|  | MYST3    | 3.34E-05 | 2 |
|  | RBM4B    | 2.17E-05 | 2 |
|  | ANKMY2   | 2.09E-03 | 2 |
|  | CTCF     | 8.56E-06 | 2 |
|  | HSD17B6  | 2.21E-04 | 2 |
|  | ABCA2    | 5.70E-03 | 2 |
|  | SMC1A    | 2.20E-03 | 2 |
|  | MTG1     | 4.06E-03 | 2 |
|  | ROM1     | 6.22E-03 | 2 |
|  | FGF19    | 5.70E-05 | 2 |
|  | TMSL8    | 4.75E-06 | 2 |
|  | RGS3     | 3.10E-03 | 2 |
|  | RLF      | 4.47E-04 | 2 |
|  | SUV39H2  | 3.17E-03 | 2 |
|  | ALG2     | 1.46E-03 | 2 |
|  | ZNF564   | 7.88E-04 | 2 |
|  | DNAI2    | 2.56E-03 | 2 |
|  | SITPEC   | 1.20E-04 | 2 |
|  | FLJ90396 | 4.77E-03 | 2 |
|  | CHD6     | 5.69E-03 | 2 |
|  | MGA      | 3.77E-03 | 2 |
|  | FLJ20105 | 2.54E-03 | 2 |
|  | VPS11    | 1.63E-03 | 2 |
|  | GSG2     | 1.81E-03 | 2 |
|  | ELF2     | 3.03E-03 | 2 |
|  | NHN1     | 4.07E-03 | 2 |
|  | SGCZ     | 9.04E-04 | 2 |
|  | CCNJL    | 2.09E-03 | 2 |
|  | BCL2L12  | 4.84E-04 | 2 |
|  | SIVA     | 1.57E-06 | 2 |
|  | ZCCHC8   | 3.58E-04 | 2 |
|  | SFRS10   | 1.76E-03 | 2 |
|  | METTTL7A | 5.58E-04 | 2 |
|  | FBXO34   | 1.53E-04 | 2 |
|  | SLC1A5   | 2.29E-05 | 2 |
|  | ZNF271   | 1.90E-04 | 2 |

|  |          |          |   |
|--|----------|----------|---|
|  | PAIP1    | 4.23E-03 | 2 |
|  | PLEKHO1  | 6.41E-03 | 2 |
|  | CCDC77   | 1.53E-03 | 2 |
|  | FLJ25715 | 4.73E-03 | 2 |
|  | AK1      | 2.90E-05 | 2 |
|  | PPIL6    | 4.20E-03 | 2 |
|  | ATP1A1   | 5.32E-03 | 2 |
|  | KIAA0101 | 7.48E-05 | 2 |
|  | S79672   | 8.43E-05 | 2 |
|  | HAT1     | 2.74E-03 | 2 |
|  | LIMD2    | 1.61E-03 | 2 |
|  | ALDH3B1  | 4.72E-03 | 2 |
|  | OR2C1    | 3.96E-03 | 2 |
|  | BUB3     | 1.14E-06 | 2 |
|  | MIS12    | 3.18E-03 | 2 |
|  | SUSD1    | 1.35E-04 | 2 |
|  | TIMP4    | 5.36E-03 | 2 |
|  | CYB5R4   | 2.63E-03 | 2 |
|  | CHD3     | 6.64E-04 | 2 |
|  | CD511705 | 1.84E-03 | 2 |
|  | ZNF148   | 5.36E-03 | 2 |
|  | BCAN     | 1.00E-03 | 2 |
|  | IBRDC1   | 7.40E-04 | 2 |
|  | APCDD1L  | 2.64E-03 | 2 |
|  | CCDC99   | 1.12E-03 | 2 |
|  | NCOA5    | 3.72E-03 | 2 |
|  | KRT18    | 2.51E-03 | 2 |
|  | LSM5     | 1.07E-03 | 2 |
|  | DHX36    | 1.90E-03 | 2 |
|  | PSMD11   | 5.72E-03 | 2 |
|  | NUP107   | 4.41E-03 | 2 |
|  | ETV6     | 1.52E-03 | 2 |
|  | ESRRA    | 3.46E-03 | 2 |
|  | POLD1    | 2.99E-03 | 2 |
|  | EPHA2    | 1.47E-03 | 2 |
|  | ERP29    | 6.18E-03 | 2 |
|  | HSPC152  | 6.06E-05 | 2 |
|  | SNAPC4   | 3.93E-05 | 2 |
|  | WDHD1    | 5.32E-03 | 2 |
|  | ST14     | 1.94E-03 | 2 |
|  | BMP2     | 2.26E-04 | 2 |
|  | SLC22A3  | 2.63E-05 | 2 |
|  | PHF3     | 9.51E-04 | 2 |

|  |          |          |   |
|--|----------|----------|---|
|  | WDSUB1   | 1.07E-03 | 2 |
|  | DGKD     | 2.51E-03 | 2 |
|  | UNQ501   | 4.38E-06 | 2 |
|  | IFT80    | 3.71E-03 | 2 |
|  | RBM22    | 1.43E-03 | 2 |
|  | PARP6    | 2.87E-03 | 2 |
|  | FBXL6    | 2.85E-03 | 2 |
|  | PRKAA2   | 2.89E-03 | 2 |
|  | KIF24    | 1.86E-03 | 2 |
|  | MYST4    | 2.12E-03 | 2 |
|  | LFNG     | 1.08E-03 | 2 |
|  | COBRA1   | 1.37E-03 | 2 |
|  | ORC3L    | 5.48E-05 | 2 |
|  | NUDT1    | 5.06E-03 | 2 |
|  | ALG14    | 3.17E-03 | 2 |
|  | PLP2     | 7.47E-04 | 2 |
|  | LRP16    | 3.17E-03 | 2 |
|  | ADCY1    | 4.60E-03 | 2 |
|  | HRSP12   | 9.50E-04 | 2 |
|  | TRMT1    | 2.43E-05 | 2 |
|  | TAF11    | 2.17E-04 | 2 |
|  | P2RX5    | 1.57E-03 | 2 |
|  | RIF1     | 1.67E-03 | 2 |
|  | HDAC1    | 5.82E-03 | 2 |
|  | HSPA5    | 4.81E-03 | 2 |
|  | KIAA1505 | 4.34E-03 | 2 |
|  | MGC4562  | 6.14E-03 | 2 |
|  | RAPGEF1  | 5.10E-03 | 2 |
|  | IPMK     | 1.85E-05 | 2 |
|  | KIAA0841 | 3.50E-03 | 2 |
|  | AGPAT2   | 2.91E-03 | 2 |
|  | DHX16    | 6.21E-03 | 2 |
|  | FTSJ2    | 1.32E-05 | 2 |
|  | DNAH17   | 8.02E-04 | 2 |
|  | PIGX     | 2.63E-03 | 2 |
|  | DMRT3    | 6.36E-03 | 2 |
|  | GOLGA2L1 | 3.84E-03 | 2 |
