# Supplementary material for: High-throughput sequencing of small RNA transcriptomes reveals critical biological features targeted by microRNAs in cell models used for squamous cell cancer research
Source: PubMed Central journal article supplement (PMC3870990; doi:10.1186/1471-2164-14-735), 2013-10-26

Cand1

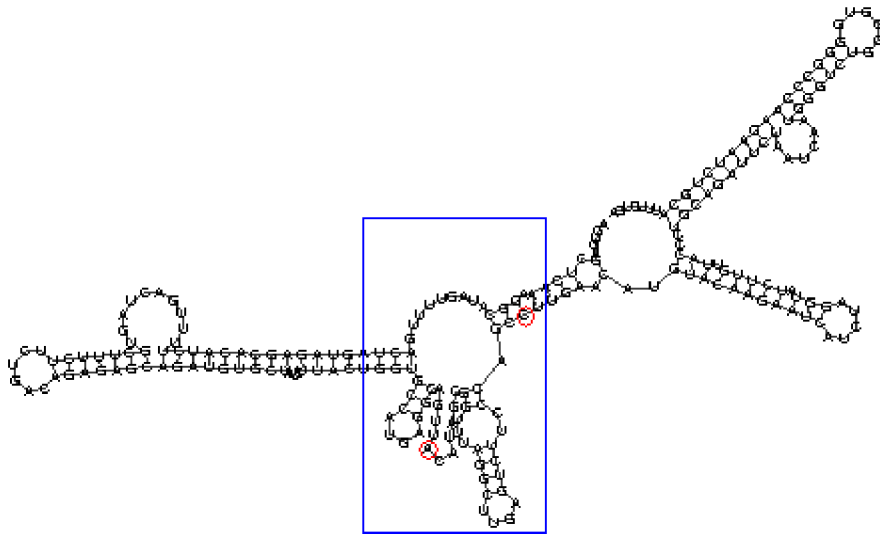

Cand2

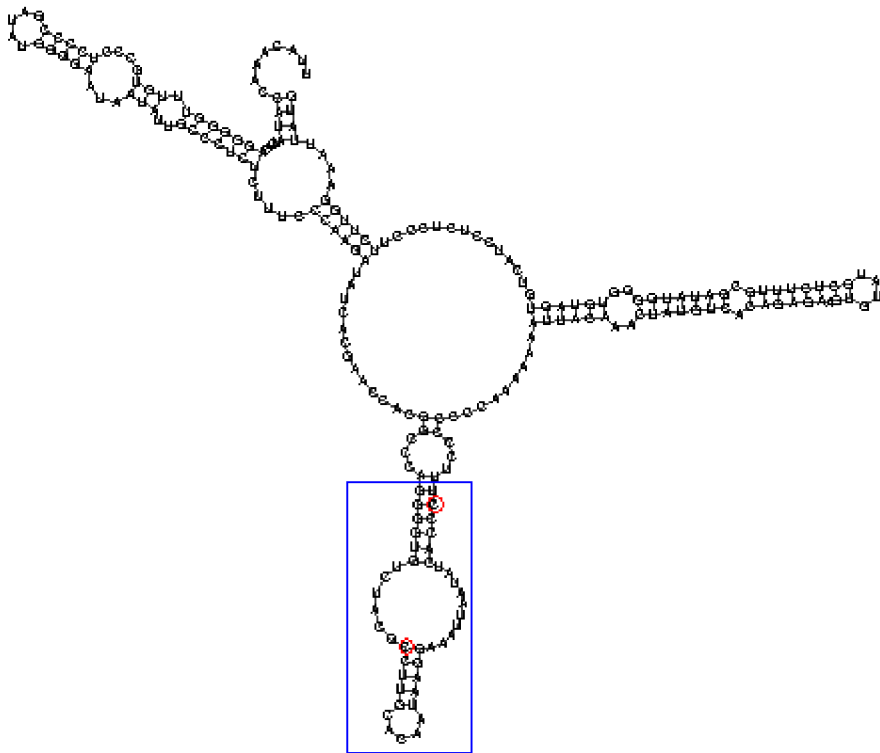

Cand3

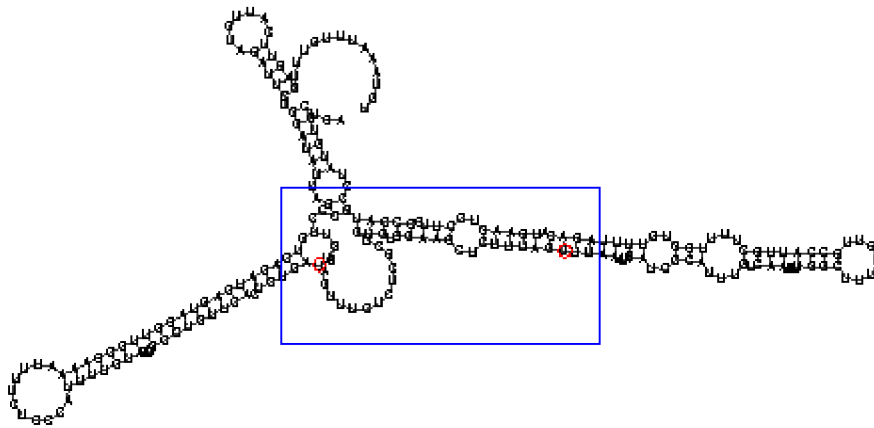

Cand4

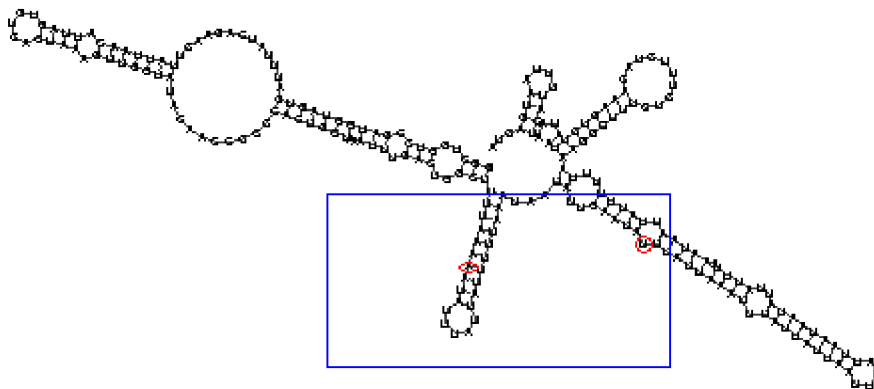

Cand5

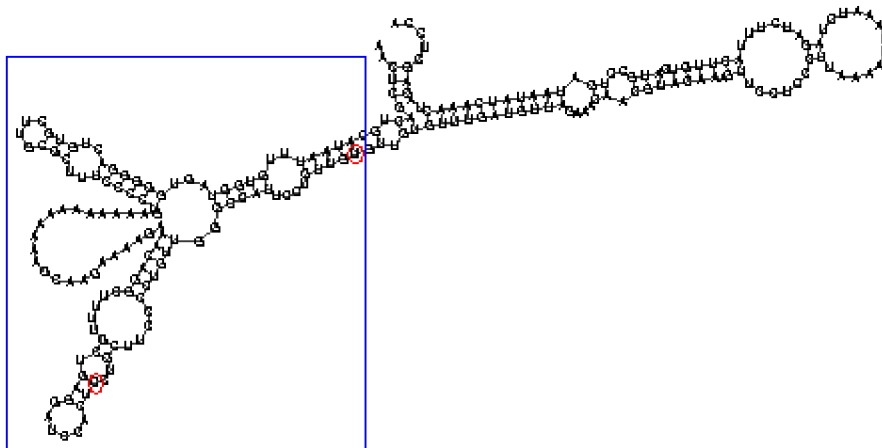

Cand6

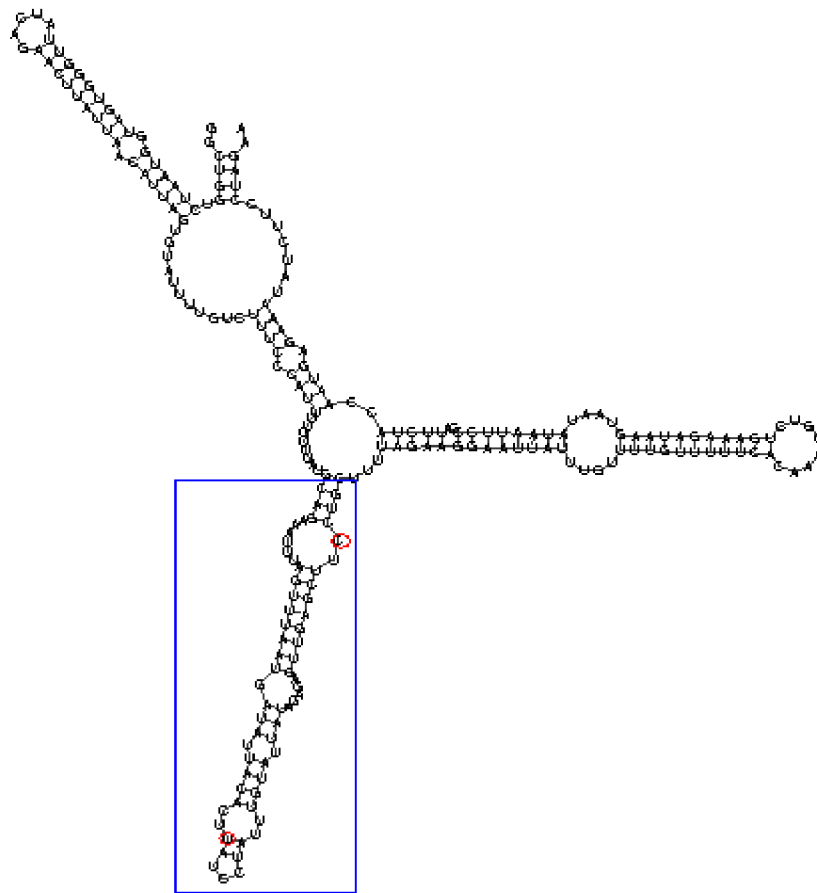

Cand7

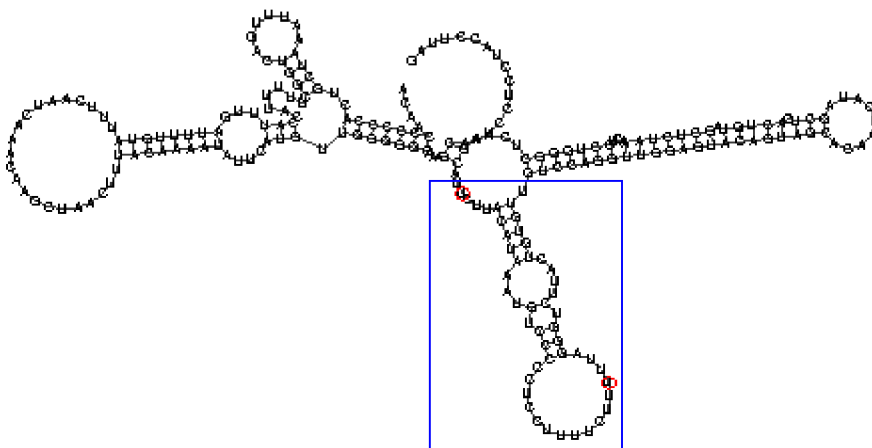

Cand8

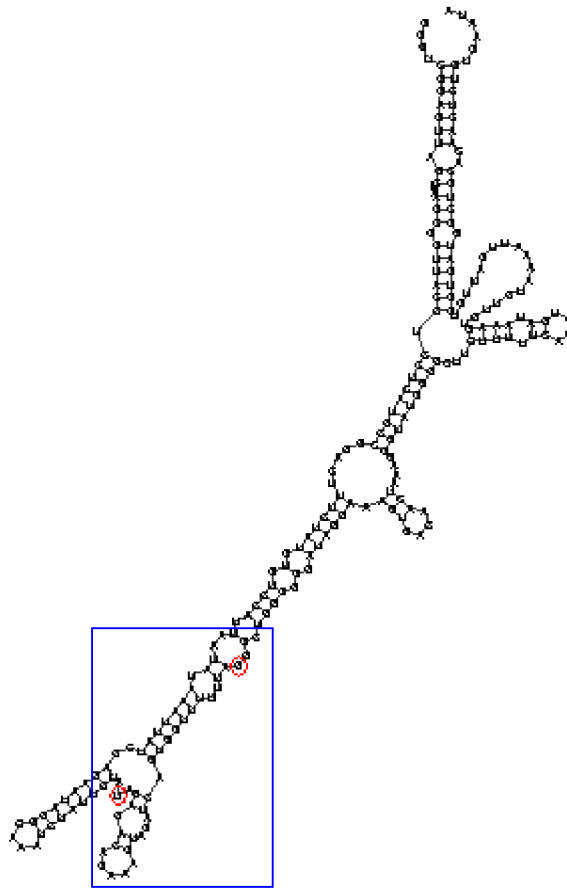

Cand9

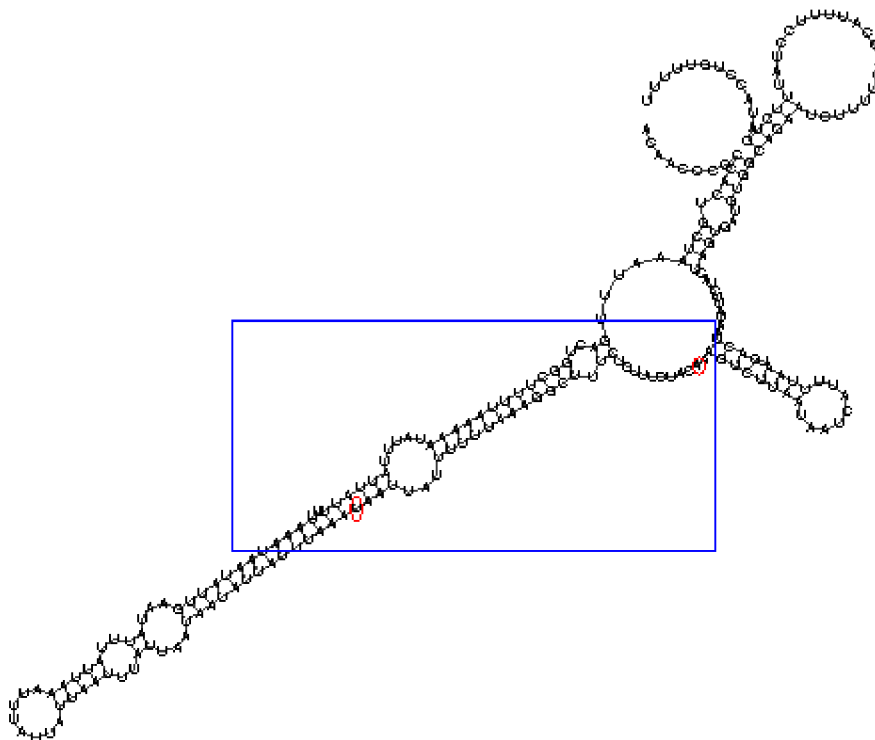

Cand10

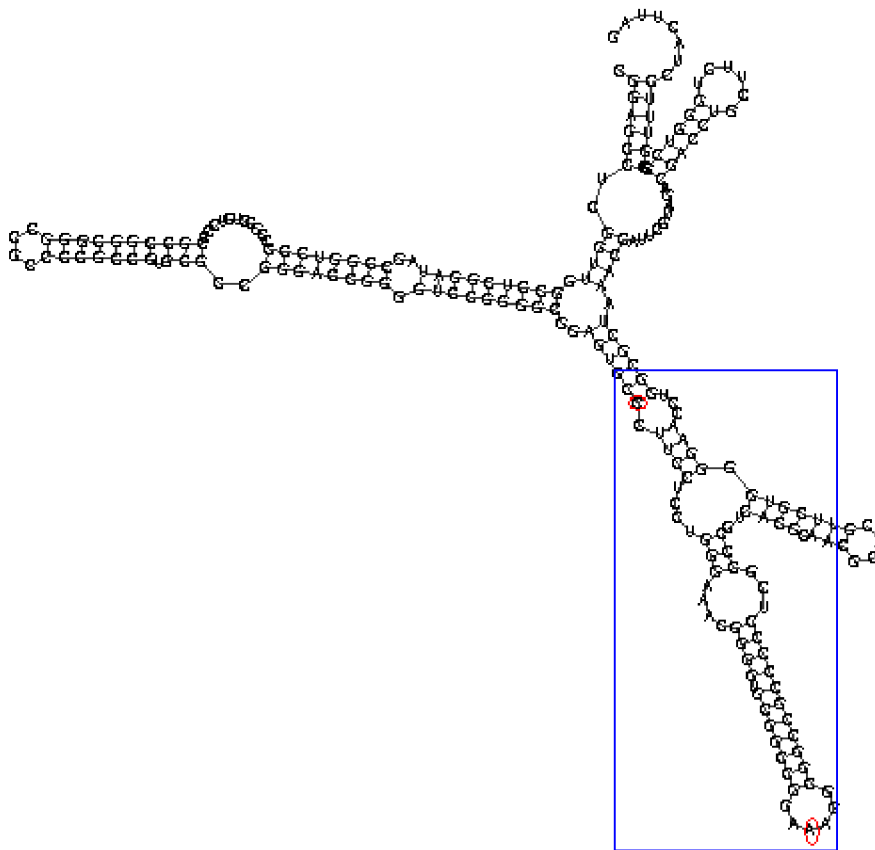

Cand11

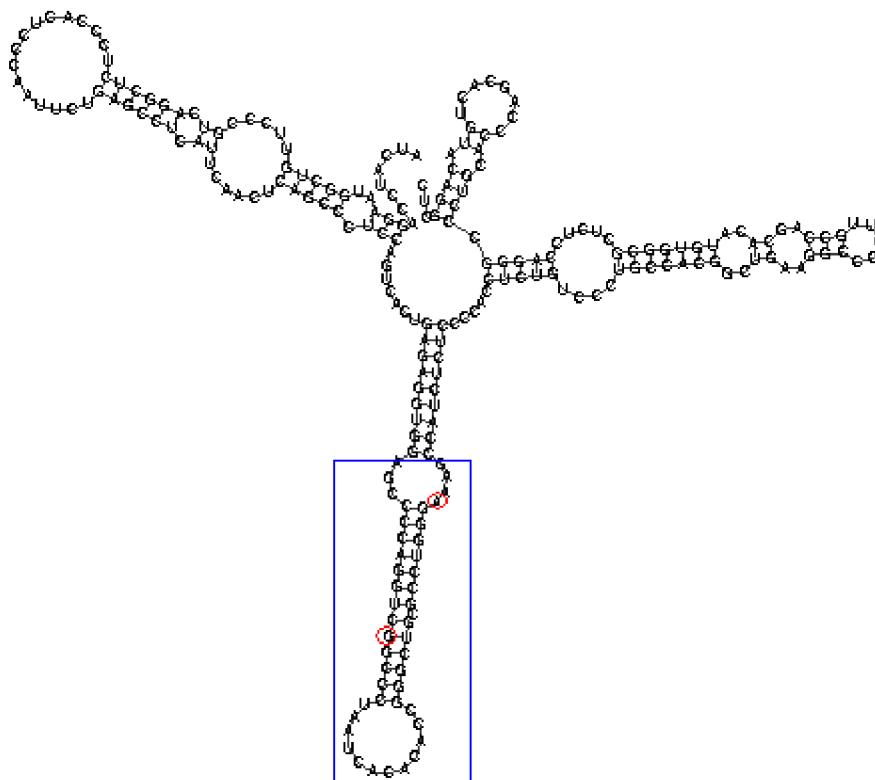

Cand12

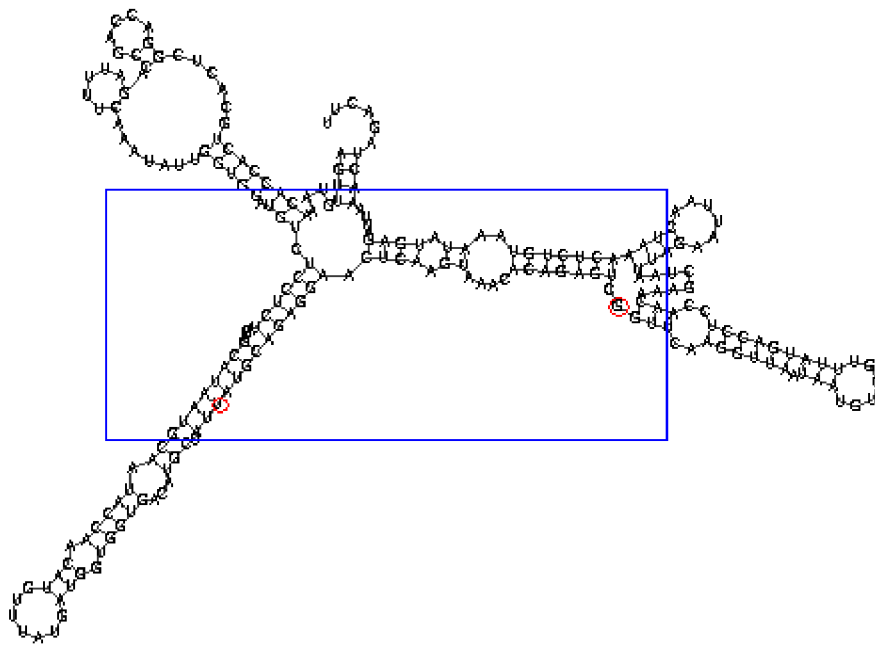

Cand13

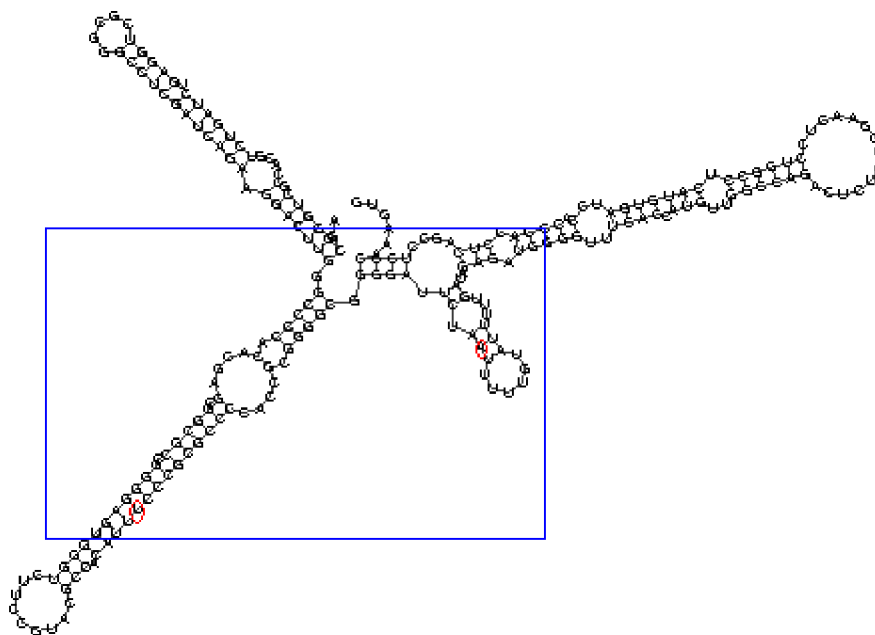

Supplement: 1471-2164-14-735-S8.pdf [file 1471-2164-14-735-S8.pdf]
