# Supplementary material for: High-throughput sequencing of small RNA transcriptomes reveals critical biological features targeted by microRNAs in cell models used for squamous cell cancer research
Source: PubMed Central journal article supplement (PMC3870990; doi:10.1186/1471-2164-14-735), 2013-10-26
Supplement: 1471-2164-14-735-S9.pdf [file 1471-2164-14-735-S9.pdf]

**Cand3**

UUGUCAGAUGAGUAGGUUGCGA  
UGUAAAUUUGUUUGAGUUCAUUGUAGAUUCUGGAUAAUAGCCCUUUGUCAGAUGAGUAGGUUGCGAAAAUUUCUCCCAUUUUG  
GGAAGCUCUUUAGUUUAAUUAG  
UAGGUUGCCUGUUCACUCUGAUGGUAGUUUCUCUCGCGUGUGGAAGCUCUUUAGUUUAAUUAGAUCCCAUUUGUCAAUUUUGGC  
UUUUGUUGCCAUUGCUUUUGGUGUUUUAGACAUGAAGUCCUUGCCAUGCCUAUGUCCUGA

**Cand4**

AACAUUAGUGUCACUAAAGUUG  
GGCUGGUCCGAUGGUAGUGAUUUUAUCAGAACUUAUUAAAUUAGUGUCACUAAAGUUGGUUAUACAACCCCCACUGCUAAAUUUG  
ACUGGCUUUUAAAAUAUUUAUUUUUUAAAUAUAUUGAAUAUUUAUUAAAUUUAUUAAUUUAUUAAUAUUUUUA  
AAAGUCUUAUAUAUCAUUUUAA  
AAUAAUUUUUUUAAAGGCUUUCUCUUUCUACAAAGUCUUAUAUAUCAUUUUAAUGACUA

**Cand9**

UGCUIAAUUUGACUGGCUUUUA  
ACAACCCCCACUGCUAAAUUUGACUGGCUUUUAAAAUAUUUAUUUUUUAAAUAUAUUGAAUAUUUAUUAAAUUUAUUUAU  
AAUUUAUUAAUAUUUAUUUUAAAUAUUUUUUAAAGGCUUUCUCUUCUACAAAGUCUUAUAUAUCAUUUUAAUGACUA  
UAAUUUAUUAAUAUUUAUUUUAAAUAUUUUUUAAAGGCUUUCUCUUCUACAAAGUCUUAUAUAUCAUUUUAAUGACUA  
AUAUUCUACUAGUGAUGUGGCAGAAUCUUUUGACCAUUUCCUAUUUCUGAUACCGUUUUU

**Cand11**

AUGGCUGUCCCGUCAGGCUCU  
AUCAUCCAGGAAUGGCUGUCCCGUCAGGCUCUCCACUCCCAAUUCUGAGCCUCAUUCAACUCAGCCCUCAGUCACUGAGAGGU  
AAGG  
GGAGCCCCAGGUCGGCCUAAUCACACACCGGGCUGCGCCUGGGAAAGCCAUCUCUCCCCACCUCUGUCCUGCCACGGCUGAAGG  
CCCCUUGCCAGCACAUUGUGGCGCUCUCCAGGGCCCUGCACCCAGCACUGUACAGGCUC  
CCCCUUGCCAGCACAUUGUGGCGCUCUCCAGGGCCCUGCACCCAGCACUGUACAGGCUC

**Cand12**

GGACCAGCCAGAUUUUCAAAUA

AGUUGUAAACACCACUGCACUCGGACCAGCCAGAUUUUCAAAUAUUGGUGGAUGUCUCCUCUAGAAGCAUAAUGCAAUACCAACA

UGGUGACAUGCUAUUAUGCAGA

UGUUUAUGAUGGUGGUGACAUGCUAUUAUGCAGAGGAACUCAAGUAAACACAGAGUCGGUUCAAGGUAAUAAUGUGGUUUAUG

ACCUCCAACAAAGCUAAUUAGAAUUAACUAAACUCUGUAAAUAUGAGAUUAAACUAGACUU
