# Supplementary material for: High-throughput sequencing of small RNA transcriptomes reveals critical biological features targeted by microRNAs in cell models used for squamous cell cancer research
Source: PubMed Central journal article supplement (PMC3870990; doi:10.1186/1471-2164-14-735), 2013-10-26
Supplement: 1471-2164-14-735-S10.pdf [file 1471-2164-14-735-S10.pdf]

|                                                    | <b>196M</b> | <b>196T</b> | <b>240M</b> | <b>240T</b> | <b>277M</b> | <b>277T</b> | <b>296M</b> | <b>296T</b> |
|----------------------------------------------------|-------------|-------------|-------------|-------------|-------------|-------------|-------------|-------------|
| <b>Filtered reads</b>                              | 2.301.939   | 4.396.489   | 7.436.013   | 2.523.693   | 17.263.580  | 36.845.055  | 11.354.744  | 4.760.347   |
| <b>Reads matching mirBase v18</b>                  | 140.004     | 129.499     | 1.085.799   | 327.542     | 1.639.635   | 141.612     | 885.503     | 178.876     |
| <b>Reads matching mature miRNAs</b>                | 111.889     | 91.870      | 716.375     | 249.910     | 1.196.691   | 112.315     | 688.186     | 141.920     |
| <b>Reads mapped to genome and not matching v18</b> | 87.045      | 89.426      | 1.425.989   | 283.404     | 1.225.542   | 342.974     | 914.833     | 185.889     |
| <b>Total of reads mapped to genome</b>             | 2.528.988   | 4.615.414   | 9.947.801   | 3.134.639   | 20.128.757  | 37.329.641  | 13.155.080  | 5.125.112   |
|                                                    | <b>306M</b> | <b>306T</b> | <b>321M</b> | <b>321T</b> | <b>333M</b> | <b>333T</b> | <b>349M</b> | <b>349T</b> |
| <b>Filtered reads</b>                              | 3.742.828   | 6.031.268   | 5.899.872   | 5.307.854   | 4.630.998   | 3.117.103   | 2.820.070   | 1.201.678   |
| <b>Reads matching mirBase v18</b>                  | 724.222     | 473.759     | 495.901     | 384.204     | 83.782      | 566.968     | 685.464     | 183.167     |
| <b>Reads matching mature miRNAs</b>                | 181.942     | 368.185     | 368.778     | 305.118     | 62.899      | 441.013     | 464.219     | 136.228     |
| <b>Reads mapped to genome and not matching v18</b> | 948.421     | 641.973     | 456.454     | 295.902     | 136.927     | 694.410     | 506.981     | 292.061     |
| <b>Total of reads mapped to genome</b>             | 5.415.471   | 7.147.000   | 6.852.227   | 5.987.960   | 4.851.707   | 4.378.481   | 4.012.515   | 1.676.906   |
