# Supplementary material for: High-throughput sequencing of small RNA transcriptomes reveals critical biological features targeted by microRNAs in cell models used for squamous cell cancer research
Source: PubMed Central journal article supplement (PMC3870990; doi:10.1186/1471-2164-14-735), 2013-10-26
Supplement: 1471-2164-14-735-S11.pdf [file 1471-2164-14-735-S11.pdf]

| Additional File 11: Fold-change between cells (SCC25 vs keratinocytes) and Clinical Samples (tumor vs tumor-free samples) |       |        |               |       |         |
|---------------------------------------------------------------------------------------------------------------------------|-------|--------|---------------|-------|---------|
| MiRNAs                                                                                                                    | Cells | 196    | MiRNAs        | Cells | 277     |
| hsa-mir-1306                                                                                                              | 5.82  | 2.87   | hsa-let-7b    | 2.03  | 21.79   |
| hsa-mir-130a                                                                                                              | 3.00  | 2.49   | hsa-let-7i    | 3.67  | 33.88   |
| hsa-mir-193b                                                                                                              | 2.08  | 21.03  | hsa-mir-125b  | 4.88  | 48.95   |
| hsa-mir-296                                                                                                               | 14.24 | 8.03   | hsa-mir-1306  | 5.82  | 7.28    |
| hsa-mir-29b                                                                                                               | 2.22  | 2.18   | hsa-mir-130a  | 3.00  | 14.48   |
| hsa-mir-409                                                                                                               | 22.00 | 2.19   | hsa-mir-133a  | 2.05  | 91.47   |
| hsa-mir-4315                                                                                                              | 3.45  | 25.55  | hsa-mir-144   | 3.88  | 33.59   |
| hsa-mir-548ar                                                                                                             | 3.24  | 2.74   | hsa-mir-193a  | 2.79  | 67.23   |
| hsa-mir-708                                                                                                               | 12.08 | 4.43   | hsa-mir-193b  | 2.08  | 22.77   |
| hsa-mir-92b                                                                                                               | 2.16  | 9.61   | hsa-mir-199a  | 5.89  | 42.86   |
| hsa-mir-628                                                                                                               | -4.64 | -5.48  | hsa-mir-22    | 2.15  | 34.63   |
|                                                                                                                           |       |        | hsa-mir-27a   | 2.44  | 24.85   |
| MiRNAs                                                                                                                    | Cells | 240    | hsa-mir-296   | 14.24 | 6.20    |
| hsa-mir-144                                                                                                               | 3.88  | 5.19   | hsa-mir-29b   | 2.22  | 68.71   |
| hsa-mir-193a                                                                                                              | 2.79  | 2.70   | hsa-mir-29c   | 3.06  | 78.48   |
| hsa-mir-199a                                                                                                              | 5.89  | 2.16   | hsa-mir-34a   | 2.10  | 10.20   |
| hsa-mir-495                                                                                                               | 17.47 | 3.65   | hsa-mir-376a  | 14.56 | 71.88   |
| hsa-mir-132                                                                                                               | -2.43 | -4.23  | hsa-mir-376c  | 15.64 | 94.88   |
| hsa-mir-181a                                                                                                              | -5.69 | -2.56  | hsa-mir-378i  | 2.36  | 52.62   |
| hsa-mir-181b                                                                                                              | -3.24 | -3.65  | hsa-mir-382   | 13.59 | 86.90   |
| hsa-mir-196a                                                                                                              | -2.65 | -19.04 | hsa-mir-409   | 22.00 | 12.82   |
| hsa-mir-619                                                                                                               | -2.51 | -15.87 | hsa-mir-4302  | 2.72  | 94.58   |
| hsa-mir-628                                                                                                               | -4.64 | -10.16 | hsa-mir-495   | 17.47 | 619.42  |
| hsa-mir-99b                                                                                                               | -2.01 | -2.31  | hsa-mir-708   | 12.08 | 12.74   |
|                                                                                                                           |       |        | hsa-mir-769   | 2.26  | 3.18    |
| MiRNAs                                                                                                                    | Cells | 296    | hsa-mir-92b   | 2.16  | 15.90   |
| hsa-let-7b                                                                                                                | 2.03  | 4.35   | hsa-mir-196a  | -2.65 | -2.07   |
| hsa-let-7i                                                                                                                | 3.67  | 4.38   |               |       |         |
| hsa-mir-125b                                                                                                              | 4.88  | 4.30   | MiRNAs        | Cells | 306     |
| hsa-mir-133a                                                                                                              | 2.05  | 9.54   | hsa-mir-125b  | 4.88  | 20.81   |
| hsa-mir-144                                                                                                               | 3.88  | 37.66  | hsa-mir-133a  | 2.05  | 465.99  |
| hsa-mir-199a                                                                                                              | 5.89  | 3.25   | hsa-mir-199a  | 5.89  | 5.70    |
| hsa-mir-29b                                                                                                               | 2.22  | 3.42   | hsa-mir-376a  | 14.56 | 24.72   |
| hsa-mir-376a                                                                                                              | 14.56 | 7.89   | hsa-mir-376c  | 15.64 | 2.27    |
| hsa-mir-376c                                                                                                              | 15.64 | 5.22   | hsa-mir-409   | 22.00 | 2.44    |
| hsa-mir-378i                                                                                                              | 2.36  | 7.83   | hsa-mir-4302  | 2.72  | 9.13    |
| hsa-mir-382                                                                                                               | 13.59 | 5.63   | hsa-mir-4315  | 3.45  | 3.63    |
| hsa-mir-409                                                                                                               | 22.00 | 2.47   | hsa-mir-495   | 17.47 | 23.54   |
| hsa-mir-4302                                                                                                              | 2.72  | 12.86  | hsa-mir-548ar | 3.24  | 3.96    |
| hsa-mir-495                                                                                                               | 17.47 | 4.78   | hsa-mir-103a  | -2.50 | -233.50 |
| hsa-mir-103a                                                                                                              | -2.50 | -2.42  | hsa-mir-132   | -2.43 | -9.01   |
| hsa-mir-196a                                                                                                              | -2.65 | -4.99  | hsa-mir-15a   | -2.58 | -3.98   |

|               |              |            |               |              |            |
|---------------|--------------|------------|---------------|--------------|------------|
| hsa-mir-205   | -2.23        | -2.57      | hsa-mir-17    | -2.34        | -9.34      |
| hsa-mir-301a  | -3.84        | -4.18      | hsa-mir-181a  | -5.69        | -3.27      |
| hsa-mir-940   | -3.35        | -17.20     | hsa-mir-18a   | -2.15        | -59.25     |
| hsa-mir-99b   | -2.01        | -3.61      | hsa-mir-196a  | -2.65        | -12.98     |
|               |              |            | hsa-mir-205   | -2.23        | -61.01     |
| <b>MiRNAs</b> | <b>Cells</b> | <b>321</b> | hsa-mir-20a   | -3.38        | -49.94     |
| hsa-mir-125b  | 4.88         | 4.17       | hsa-mir-301a  | -3.84        | -13.40     |
| hsa-mir-144   | 3.88         | 6.75       | hsa-mir-940   | -3.35        | -8.16      |
| hsa-mir-193a  | 2.79         | 2.05       | hsa-mir-99b   | -2.01        | -7.61      |
| hsa-mir-199a  | 5.89         | 2.21       |               |              |            |
| hsa-mir-34a   | 2.10         | 2.23       | <b>MiRNAs</b> | <b>Cells</b> | <b>333</b> |
| hsa-mir-4302  | 2.72         | 2.90       | hsa-mir-100   | -2.84        | -39.00     |
| hsa-mir-708   | 12.08        | 3.73       | hsa-mir-103a  | -2.50        | -9.48      |
| hsa-mir-18a   | -2.15        | -3.33      | hsa-mir-10a   | -7.73        | -13.81     |
| hsa-mir-196a  | -2.65        | -46.73     | hsa-mir-132   | -2.43        | -9.25      |
| hsa-mir-301a  | -3.84        | -2.96      | hsa-mir-15a   | -2.58        | -17.13     |
| hsa-mir-940   | -3.35        | -2.50      | hsa-mir-17    | -2.34        | -5.39      |
|               |              |            | hsa-mir-181a  | -5.69        | -8.08      |
| <b>MiRNAs</b> | <b>Cells</b> | <b>349</b> | hsa-mir-181b  | -3.24        | -17.37     |
| hsa-mir-125b  | 4.88         | 6.14       | hsa-mir-181c  | -10.24       | -6.28      |
| hsa-mir-133a  | 2.05         | 29.35      | hsa-mir-18a   | -2.15        | -3.66      |
| hsa-mir-144   | 3.88         | 3.08       | hsa-mir-196a  | -2.65        | -5.46      |
| hsa-mir-29c   | 3.06         | 2.71       | hsa-mir-20a   | -3.38        | -2.30      |
| hsa-mir-376a  | 14.56        | 22.99      | hsa-mir-301a  | -3.84        | -5.81      |
| hsa-mir-376c  | 15.64        | 47.95      | hsa-mir-30c   | -3.18        | -9.07      |
| hsa-mir-378i  | 2.36         | 3.60       | hsa-mir-4301  | -2.32        | -7.48      |
| hsa-mir-4302  | 2.72         | 5.55       | hsa-mir-619   | -2.51        | -4.99      |
| hsa-mir-495   | 17.47        | 5.43       | hsa-mir-625   | -2.21        | -6.87      |
| hsa-mir-92b   | 2.16         | 2.17       | hsa-mir-628   | -4.64        | -2.95      |
| hsa-mir-103a  | -2.50        | -4.20      | hsa-mir-940   | -3.35        | -9.97      |
| hsa-mir-17    | -2.34        | -2.35      | hsa-mir-99b   | -2.01        | -15.29     |
| hsa-mir-18a   | -2.15        | -5.23      |               |              |            |
| hsa-mir-196a  | -2.65        | -72.98     |               |              |            |
| hsa-mir-301a  | -3.84        | -5.25      |               |              |            |
| hsa-mir-940   | -3.35        | -3.63      |               |              |            |
| hsa-mir-99b   | -2.01        | -2.83      |               |              |            |
